# Supplementary material for: The McKenna reaction – avoiding side reactions in phosphonate deprotection
Source: publisher site journal article supplement (doi:10.3762/bjoc.16.119), 2020-06-23
Supplement: Additional file 1 [file 1860-5397-16-119-S1.pdf]

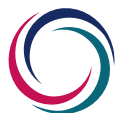

## Supporting Information

for

### **The McKenna reaction – avoiding side reactions in phosphonate deprotection**

Katarzyna Justyna, Joanna Małolepsza, Damian Kusy, Waldemar Maniukiewicz  
and Katarzyna M. Błażewska

*Beilstein J. Org. Chem.* **2020**, *16*, 1436–1446. doi:10.3762/bjoc.16.119

**Synthesis of starting materials, copies of  $^{31}\text{P}$  NMR,  $^1\text{H}$  NMR, and  $^{13}\text{C}$  NMR spectra for all new compounds and selected NMR spectra illustrating the formation of the side products**

## Table of contents

|                                                                                                                                           |     |
|-------------------------------------------------------------------------------------------------------------------------------------------|-----|
| <b>1. Synthesis of substrates</b>                                                                                                         | S3  |
| <b>1.1. 4-Nitro-<i>N</i>-(prop-2-yn-1-yl)benzamide (10)</b>                                                                               | S3  |
| <b>1.2. <i>N</i>-Phenethylacrylamide (11)</b>                                                                                             | S3  |
| <b>1.3. General procedure: Synthesis of phosphonocarboxylate analogues of risedronate (9a-e)</b>                                          | S3  |
| <b>1.4. 2-Chloro-<i>N</i>-phenethylacetamide (13)</b>                                                                                     | S6  |
| <b>1.5. 4-(Dimethylamino)-<i>N</i>-phenethylbut-2-enamide (12)</b>                                                                        | S6  |
| <b>2. Synthesis of side products under McKenna reaction conditions</b>                                                                    | S7  |
| <b>2.1. Synthesis of compounds 15–17</b>                                                                                                  | S7  |
| <b>2.2. 3-Bromo-<i>N</i>-phenethylpropanamide (18)</b>                                                                                    | S8  |
| <b>2.3. 3-(3-Ethoxy-2-fluoro-3-oxo-2-phosphonopropyl)-1-ethylpyridin-1-ium (20)</b>                                                       | S8  |
| <b>2.4. 2-Bromo-<i>N</i>-phenethylacetamide (22)</b>                                                                                      | S9  |
| <b>2.5. <i>N</i>-Ethyl-<i>N,N</i>-dimethyl-4-oxo-4-(phenethylamino)but-2-en-1-aminium (21)</b>                                            | S9  |
| <b>3. NMR Spectra of side products generated under Mc Kenna reaction conditions</b>                                                       | S11 |
| <b>3.1. Compounds 15–17</b>                                                                                                               | S11 |
| <b>Figure S1: <sup>1</sup>H NMR of compound 15 (CDCl<sub>3</sub>, 700 MHz).</b>                                                           | S11 |
| <b>Figure S2: <sup>13</sup>C NMR of compound 15 (CDCl<sub>3</sub>, 176 MHz).</b>                                                          | S12 |
| <b>3.1.1. X-ray Crystallography of compound 15</b>                                                                                        | S12 |
| <b>Figure S3: Molecular structure of 15 from X-ray crystallographic analysis.</b>                                                         | S13 |
| <b>Table S1. Crystal and structure refinement data.</b>                                                                                   | S13 |
| <b>Figure S4: <sup>1</sup>H NMR of compound 16 and 17 (CDCl<sub>3</sub>, 700 MHz).</b>                                                    | S14 |
| <b>Figure S5: <sup>1</sup>H NMR of compound 16 and 17 (CDCl<sub>3</sub>, 700 MHz): zoom in of the range 4.2–8.2.</b>                      | S15 |
| <b>Figure S6: <sup>13</sup>C NMR of compound 16 and 17 (CDCl<sub>3</sub>, 176 MHz).</b>                                                   | S15 |
| <b>3.2. Optimization of oxazole synthesis</b>                                                                                             | S16 |
| <b>Table S2: Optimization of the oxazole synthesis.<sup>a</sup></b>                                                                       | S16 |
| <b>3.3 Compound 18</b>                                                                                                                    | S17 |
| <b>Figure S7: <sup>1</sup>H NMR of compound 18 (CDCl<sub>3</sub>, 700 MHz).</b>                                                           | S17 |
| <b>Figure S8: <sup>13</sup>C NMR of compound 18 (CDCl<sub>3</sub>, 176 MHz).</b>                                                          | S17 |
| <b>3.4 Compound 20</b>                                                                                                                    | S18 |
| <b>Figure S9: <sup>1</sup>H NMR of compound 20 (CDCl<sub>3</sub>, 700 MHz).</b>                                                           | S18 |
| <b>Figure S10: <sup>1</sup>H NMR of compound 20 (CDCl<sub>3</sub>, 700 MHz): zoom in of the ranges 1.1–1.7, 3.6–4.8, and 7.9–8.9 ppm.</b> | S18 |

|                                                                                                                                                                                                                                                                                                                                                                                                                                                                   |     |
|-------------------------------------------------------------------------------------------------------------------------------------------------------------------------------------------------------------------------------------------------------------------------------------------------------------------------------------------------------------------------------------------------------------------------------------------------------------------|-----|
| <b>Figure S11:</b> $^{13}\text{C}$ NMR of compound <b>20</b> ( $\text{CDCl}_3$ , 176 MHz).                                                                                                                                                                                                                                                                                                                                                                        | S19 |
| <b>Figure S12:</b> $^{31}\text{P}$ NMR of compound <b>20</b> ( $\text{CDCl}_3$ , 283 MHz).                                                                                                                                                                                                                                                                                                                                                                        | S19 |
| <b>Figure S13:</b> Top and middle: Monitoring of the alkylation reaction progress for compound <b>9b</b> at the first stage of the McKenna reaction (BTMS stage); top: $^{31}\text{P}$ NMR after 24 h; middle: $^{31}\text{P}$ NMR after 7 days. Bottom: $^{31}\text{P}$ NMR spectrum of the alkylation product <b>20</b> after solvolysis and HPLC purification.                                                                                                 | S20 |
| <b>3.5 Compound 22</b>                                                                                                                                                                                                                                                                                                                                                                                                                                            | S21 |
| <b>Figure S14:</b> $^1\text{H}$ NMR of compound <b>22</b> ( $\text{CDCl}_3$ , 700 MHz).                                                                                                                                                                                                                                                                                                                                                                           | S21 |
| <b>Figure S15:</b> $^{13}\text{C}$ NMR of compound <b>22</b> ( $\text{CDCl}_3$ , 176 MHz).                                                                                                                                                                                                                                                                                                                                                                        | S21 |
| <b>Figure S16:</b> Monitoring by $^1\text{H}$ NMR of the reaction progress between <b>13</b> and BTMS ( $\text{CD}_3\text{CN}$ , 700 MHz): zoom in of the ranges 2.7–4.3 ppm.                                                                                                                                                                                                                                                                                     | S22 |
| <b>3.6 Compound 21</b>                                                                                                                                                                                                                                                                                                                                                                                                                                            | S23 |
| <b>Figure S17:</b> $^1\text{H}$ NMR of compound <b>21</b> ( $\text{CD}_3\text{OD}$ , 700 MHz).                                                                                                                                                                                                                                                                                                                                                                    | S23 |
| <b>Figure S18:</b> $^{13}\text{C}$ NMR of compound <b>21</b> ( $\text{CD}_3\text{OD}$ , 176 MHz).                                                                                                                                                                                                                                                                                                                                                                 | S24 |
| <b>Figure S19:</b> Comparison of the $^1\text{H}$ NMR spectra of substrate <b>12</b> (bottom spectrum) and product <b>21</b> (top spectrum; compound contaminated with $\approx 10\%$ of substrate <b>12</b> ) ( $\text{CD}_3\text{OD}$ + TFA, 700 MHz): zoom in of the ranges 1.25–4.20, and 6.30–7.35 ppm. The representative peaks were identified.                                                                                                            | S24 |
| <b>3.7 Monitoring the experiments for section 5 by NMR</b>                                                                                                                                                                                                                                                                                                                                                                                                        | S25 |
| <b>Figure S20:</b> Monitoring of the reaction between <b>8b</b> and BTMS: top: $^1\text{H}$ NMR spectrum of <b>8b</b> before adding BTMS; middle: $^1\text{H}$ NMR after 24 h of reaction between <b>8b</b> and BTMS ( $\text{CD}_3\text{CN}$ , 700 MHz); bottom: $^1\text{H}$ NMR after 5 min of solvolysis ( $\text{CD}_3\text{OD}$ , 700 MHz); zoom in of the ranges 3.45–2.7 and 2.0–1.2 ppm; see Table 4, entry 3.                                           | S25 |
| <b>Figure S21:</b> Monitoring of the reaction between <b>8b</b> and BTMS in the presence of 1 equiv of TEA: top: $^1\text{H}$ NMR spectrum of <b>8b</b> before adding BTMS; middle: $^1\text{H}$ NMR after 24 h of reaction between <b>8b</b> and BTMS ( $\text{CD}_3\text{CN}$ , 700 MHz); bottom: $^1\text{H}$ NMR after 5 min of solvolysis ( $\text{CD}_3\text{OD}$ , 700 MHz); zoom in of the ranges 3.15–2.7 and 2.0–1.25 ppm; see Table 4, entry 4.        | S25 |
| <b>Figure S21a:</b> Monitoring the reaction between <b>8b</b> and BTMS in the presence of 1 equiv of TEA: top: $^{31}\text{P}$ NMR spectrum of <b>8b</b> before adding BTMS; middle: $^{31}\text{P}$ NMR after 24 h of reaction between <b>8b</b> and BTMS ( $\text{CD}_3\text{CN}$ , 700 MHz); bottom: $^{31}\text{P}$ NMR after 5 min of solvolysis ( $\text{CD}_3\text{OD}$ , 700 MHz); zoom in of the ranges 3.15–2.7 and 2.0–1.25 ppm; see Table 4, entry 4. | S26 |
| <b>Figure S22:</b> Monitoring the reaction between <b>8b</b> and BTMS in the presence of 2 equiv of pyridine: top: $^1\text{H}$ NMR spectrum of <b>8b</b> before adding of BTMS; middle: $^1\text{H}$ NMR after 24 h of reaction between <b>8b</b> and BTMS ( $\text{CD}_3\text{CN}$ , 700 MHz); bottom: $^1\text{H}$ NMR after 5 min of solvolysis ( $\text{CD}_3\text{OD}$ , 700 MHz); zoom in of the ranges 3.5–2.7 and 2.0–1.25 ppm; see Table 4, entry 5.    | S26 |
| <b>4. References</b>                                                                                                                                                                                                                                                                                                                                                                                                                                              | S27 |

## 1. Synthesis of substrates

### 1.1. 4-Nitro-*N*-(prop-2-yn-1-yl)benzamide (10)<sup>1</sup>

The reaction was run under an inert gas atmosphere (Ar). In a dried round-bottomed flask equipped with a septum propargylamine hydrochloride (740 mg, 8.08 mmol, 1.5 equiv) and triethylamine (12.4 mL) in 22 mL of dry dichloromethane were placed. Then the mixture was cooled to  $-40\text{ }^{\circ}\text{C}$  and a solution of 4-nitrobenzoyl chloride (1 g, 5.39 mmol, 1 equiv) in dry  $\text{CH}_2\text{Cl}_2$  (22 mL) was added dropwise. The reaction was stirred for 24 h at room temperature. Afterwards the reaction was quenched by the addition of water (7.4 mL). After 10 minutes, additional 22 mL of water were added and the mixture extracted with  $\text{CHCl}_3$  ( $3 \times 80\text{ mL}$ ). The combined extracts were dried ( $\text{MgSO}_4$ ) and concentrated to give the crude product, which was purified by column chromatography (DCM/acetone 0–30%). Yield 1.080 g (98%) from 1 g (5.39 mmol) of 4-nitrobenzoyl chloride.

**$^1\text{H}$  NMR** ( $\text{CDCl}_3$ , 700 MHz):  $\delta_{\text{H}}$  2.32 (1H, t,  $J = 2.6\text{ Hz}$ ,  $\text{CH}_2\text{CCH}$ ), 4.28 (2H, dd,  $J = 5.2, 2.6\text{ Hz}$ ,  $\text{CH}_2\text{CCH}$ ), 6.33 (1H, bs,  $\text{CO-NH}$ ), 7.91–7.98 (2H, m,  $\text{CH}_{\text{Ar}}$ ), 8.26–8.34 (m, 2H,  $\text{CH}_{\text{Ar}}$ ).

### 1.2. *N*-Phenethylacrylamide (11):<sup>2</sup>

The reaction was run under inert gas atmosphere (Ar). In a dried round-bottomed flask equipped with a septum 2-phenethylamine (1 g, 8.25 mmol, 1 equiv) in 15 mL of dry dichloromethane was placed. Then the mixture was cooled to  $-50\text{ }^{\circ}\text{C}$  and triethylamine (24.8 mmol, 3 equiv) and acryloyl chloride (1.494 g, 16.5 mmol, 2 equiv) were added. The reaction was stirred for 1.5 h at  $-50\text{ }^{\circ}\text{C}$ . Then water was added and the mixture extracted with  $\text{CHCl}_3$  ( $3 \times 20\text{ mL}$ ) at pH 9 (adjusted by  $\text{Na}_2\text{CO}_3$  (sat.), if needed). The combined extracts were dried over ( $\text{MgSO}_4$ ) and concentrated to give the crude product, which was purified by flash column chromatography (hexane/AcOEt 0–50%). Yield 743 mg (51.4%) from 1 g (8.25 mmol) of 2-phenethylamine.

**$^1\text{H}$  NMR** ( $\text{CDCl}_3$ , 250 MHz):  $\delta_{\text{H}}$  2.86 (2H, t,  $J = 6.9\text{ Hz}$ ,  $\text{Ar-CH}_2\text{-CH}_2$ ), 3.61 (2H, td,  $J = 7.0, 6.0\text{ Hz}$ ,  $\text{Ar-CH}_2\text{-CH}_2$ ), 5.56–5.66 (1H, m,  $\text{CH=CH}_2$ ), 5.95–6.10 (1H, m,  $\text{CH=CH}_2$ ), 6.21–6.31 (1H, m,  $\text{CH=CH}_2$ ), 7.15–7.37 (5H, m,  $\text{CH}_{\text{Ar}}$ ).

### 1.3. General procedure:<sup>3</sup> Synthesis of phosphonocarboxylate analogues of risedronate (9a-e)

Step I: The reaction was run under inert gas atmosphere (Ar). In a dried round-bottomed flask equipped with a septum the appropriate phosphonoacetate (1 equiv) in 15 mL of dry

dichloromethane (0.3 M solution) was placed. The mixture was cooled to  $-40\text{ }^{\circ}\text{C}$  and  $\text{TiCl}_4$  (1 equiv) and triethylamine (2.8 equiv) were added slowly, maintaining the temperature constant. After 15 minutes, 3-pyridinealdehyde was added dropwise. The reaction mixture was stirred for 30 min at  $-40\text{ }^{\circ}\text{C}$ , followed by 24 h at room temperature. Then, 30 mL of water and saturated  $\text{Na}_2\text{CO}_3$  were added to adjust pH to around 9 and the mixture was extracted with  $\text{CHCl}_3$  ( $5 \times 30\text{ mL}$ ). The combined extracts were dried ( $\text{MgSO}_4$ ) and concentrated to give the crude product, which was purified by flash column chromatography (DCM/acetone 0–30%).

Step II: In a round-bottomed flask the appropriate vinyl analogue of phosphonocarboxylate (1 equiv) in MeOH (0.1 M solution) was placed. Then, the  $\text{NiCl}_2 \cdot 6\text{H}_2\text{O}$  (1.2 equiv) was added, the mixture cooled to  $-40\text{ }^{\circ}\text{C}$  and  $\text{NaBH}_4$  added in portions until the substrate disappeared as monitored by mass spectrometry. The reaction was quenched by the addition of a saturated aqueous solution of  $\text{NH}_4\text{Cl}$  and the mixture extracted with  $\text{CH}_2\text{Cl}_2$  ( $4 \times 60\text{ mL}$ ) at pH 9 (adjusted with  $\text{Na}_2\text{CO}_3(\text{sat.})$ ). The combined extracts were dried ( $\text{MgSO}_4$ ) and concentrated to give the crude product, which was purified by flash column chromatography (DCM/acetone 0–50%).

Step III: The reaction was run under inert gas atmosphere (Ar). In a dried round-bottomed flask equipped with a septum  $\text{NaH}$  (1.2 equiv; 60% dispersion in mineral oil) in 10 mL of dry THF (0.32 M solution) was placed. The mixture was cooled to  $-15\text{ }^{\circ}\text{C}$  and a solution of the appropriate phosphonopropionate (1 equiv) in 7 mL of dry THF (0.23 M solution) was added dropwise and the resulting mixture was stirred for 50 min at  $0\text{ }^{\circ}\text{C}$ . Next, the reaction mixture was cooled to  $-78\text{ }^{\circ}\text{C}$  and a solution of NFSI (1.5 equiv) in dry THF (0.34 M solution) added dropwise. The reaction mixture was stirred for 20 min at  $-60\text{ }^{\circ}\text{C}$ , followed by 1.5 h at  $-20$  to  $(-40)\text{ }^{\circ}\text{C}$ . At  $-20\text{ }^{\circ}\text{C}$ , 5 mL of a saturated aqueous solution of  $\text{NH}_4\text{Cl}$  and 5 mL of water were added and when the mixture had reached rt it was extracted with  $\text{CHCl}_3$  ( $4 \times 20\text{ mL}$ ). The combined extracts were dried ( $\text{MgSO}_4$ ) and concentrated to give the crude product, which was purified by flash column chromatography (DCM/acetone).

**Ethyl 2-(diethoxyphosphoryl)-3-(pyridin-3-yl)propanoate (9a):**<sup>4</sup> Yield 726 mg (72 %) from 1 g (3.19 mmol) of ethyl 2-(diethoxyphosphoryl)-3-(pyridin-3-yl)acrylate; <sup>1</sup>H NMR ( $\text{CDCl}_3$ , 250 MHz):  $\delta_{\text{H}}$  1.15 (3H, t,  $J = 7.1\text{ Hz}$ ,  $\text{COOCH}_2\text{CH}_3$ ), 1.34 (6H, t,  $J = 7.1\text{ Hz}$ ,  $\text{PO}(\text{OCH}_2\text{CH}_3)_2$ ), 3.11-3.34 (3H, m,  $\text{Py-CH}_2\text{-CH}$ ), 4.00-4.30 (6H, m,  $\text{COOCH}_2\text{CH}_3$  and  $\text{PO}(\text{OCH}_2\text{CH}_3)_2$ ), 7.20 (1H, ddd,  $J = 7.8, 4.8, 0.9\text{ Hz}$ , Py), 7.53 (1H, dt,  $J = 7.8, 2.0\text{ Hz}$ , Py), 8.43-8.49 (2H, m, Py). <sup>31</sup>P NMR ( $\text{CDCl}_3$ , 101 MHz):  $\delta_{\text{P}}$  21.43 (s).<sup>52</sup>

**Ethyl 2-(diethoxyphosphoryl)-2-fluoro-3-(pyridin-3-yl)propanoate (9b):** Yield 378 mg (71 %) from 500 mg (1.59 mmol) of ethyl 2-(diethoxyphosphoryl)-3-(pyridin-3-yl)propanoate;  $^1\text{H}$  NMR ( $\text{CDCl}_3$ , 700 MHz):<sup>52</sup>  $\delta_{\text{H}}$  1.19 (3H, t,  $J = 7.1$  Hz,  $\text{COOCH}_2\text{CH}_3$ ), 1.37 (6H, q,  $J = 7.0$  Hz,  $\text{PO}(\text{OCH}_2\text{CH}_3)_2$ ), 3.41-3.56 (2H, m,  $\text{Py-CH}_2\text{-CF}$ ), 4.16-4.32 (6H, m,  $\text{COOCH}_2\text{CH}_3$  and  $\text{PO}(\text{OCH}_2\text{CH}_3)_2$ ), 7.22 (1H, ddd,  $J = 7.8, 4.8, 0.9$  Hz, Py), 7.58-7.52 (1H, m, Py), 8.47-8.48 (1H, m, Py), 8.51 (1H, dd,  $J = 4.8, 1.7$  Hz, Py).  $^{31}\text{P}$  NMR ( $\text{CDCl}_3$ , 283 MHz):  $\delta_{\text{P}}$  11,88 (d,  $J_{\text{PF}} = 82$  Hz).

**Ethyl 2-(diisopropoxyphosphoryl)-3-(pyridin-3-yl)propanoate (9c):** Yield 2.106 g (76 %) from 2.737 g (8.02 mmol) of ethyl 2-(diisopropoxyphosphoryl)-3-(pyridin-3-yl)acrylate;  $^1\text{H}$  NMR ( $\text{CDCl}_3$ , 700 MHz):  $\delta_{\text{H}}$  1.13 (3H, t,  $J = 7.1$  Hz,  $\text{COOCH}_2\text{CH}_3$ ), 1.32 (12H, dt,  $J = 9.6, 5.9$  Hz,  $\text{PO}(\text{OCH}(\text{CH}_3)_2)_2$ ), 3.09-3.24 (3H, m,  $\text{Py-CH}_2\text{-CH}$ ), 4.03-4.11 (2H, m,  $\text{COOCH}_2\text{CH}_3$ ), 4.69-4.76 (2H, m,  $\text{PO}(\text{OCH}(\text{CH}_3)_2)_2$ ), 7.15-7.18 (1H, m, Py), 7.48-7.51 (1H, m, Py), 8.43 (1H, dd,  $J = 4.8, 1.7$  Hz, Py), 8.44 (1H, d,  $J = 2,4$  Hz, Py).  $^{13}\text{C}$  NMR ( $\text{CDCl}_3$ , 176 MHz):  $\delta_{\text{C}}$  14.10, 23.85 (d,  $J = 5.2$  Hz), 23.97 (d,  $J = 5.1$  Hz), 24.08 (d,  $J = 4.0$  Hz), 24.24 (d,  $J = 3.3$  Hz), 30.36 (d,  $J = 4.1$  Hz), 48.19 (d,  $J = 131$  Hz), 61.51, 71.68 (d,  $J = 7.1$  Hz), 71.93 (d,  $J = 6.9$  Hz), 123.40, 134.37 (d,  $J = 15.9$  Hz), 136.25, 148.25, 150.22, 168.30 (d,  $J = 5.1$  Hz).  $^{31}\text{P}$  NMR ( $\text{CDCl}_3$ , 283 MHz):  $\delta_{\text{P}}$  18.92 (s).

**Ethyl 2-(diisopropoxyphosphoryl)-2-fluoro-3-(pyridin-3-yl)propanoate (9d):** Yield 200 mg (38 %) from 500 mg (1.46 mmol) of ethyl 2-(diisopropoxyphosphoryl)-3-(pyridin-3-yl)propanoate;  $^1\text{H}$  NMR ( $\text{CDCl}_3$ , 700 MHz):  $\delta_{\text{H}}$  1.17 (3H, t,  $J = 7.1$  Hz,  $\text{COOCH}_2\text{CH}_3$ ), 1.31-1.38 (12H, m,  $\text{PO}(\text{OCH}(\text{CH}_3)_2)_2$ ), 3.37-3.51 (2H, m,  $\text{Py-CH}_2\text{-CF}$ ), 4.12-4.20 (2H, m,  $\text{COOCH}_2\text{CH}_3$ ), 4.76-4.88 (2H, m,  $\text{PO}(\text{OCH}(\text{CH}_3)_2)_2$ ), 7.19 (1H, ddd,  $J = 7.8, 4.8, 0.9$  Hz, Py), 7.55-7.59 (1H, m, Py), 8.44 (1H, d,  $J = 2.0$  Hz, Py), 8.48 (1H, dd,  $J = 4.8, 1.7$  Hz, Py).  $^{13}\text{C}$  NMR ( $\text{CDCl}_3$ , 176 MHz):  $\delta_{\text{C}}$  14.08, 23.71 (d,  $J = 5.6$  Hz), 23.81 (d,  $J = 5.3$  Hz), 24.23 (d,  $J = 3.3$  Hz), 24.34 (d,  $J = 2.8$  Hz), 36.72 (d,  $J = 19.7$  Hz), 62.46, 73.57 (d,  $J = 7.1$  Hz), 73.81 (d,  $J = 7.0$  Hz), 123.31, 129.36 (d,  $J = 12.7$  Hz), 137.93, 148.94, 151.26, 166.38 (d,  $J = 3.9$  Hz), 166.51 (d,  $J = 3.9$  Hz).  $^{31}\text{P}$  NMR ( $\text{CDCl}_3$ , 283 MHz):  $\delta_{\text{P}}$  10.01 (d,  $J_{\text{PF}} = 84.5$  Hz).

**tert-Butyl 2-(diethoxyphosphoryl)-3-(pyridin-3-yl)propanoate (9e):** Yield 1.049 g (35 %) from 3 g (8.80 mmol) of tert-butyl 2-(diethoxyphosphoryl)-3-(pyridin-3-yl)acrylate;  $^1\text{H}$  NMR ( $\text{CDCl}_3$ , 700 MHz):  $\delta_{\text{H}}$  1.30 (9H, s,  $\text{COOC}(\text{CH}_3)_3$ ), 1.32 (6H, t,  $J = 7.1$  Hz,  $\text{PO}(\text{OCH}_2\text{CH}_3)_2$ ), 3.07-3.22 (3H, m,  $\text{Py-CH}_2\text{-CH}$ ), 4.11-4.19 (4H, m,  $\text{PO}(\text{OCH}_2\text{CH}_3)_2$ ), 7.15-7.18 (1H, m, Py), 7.50-7.53 (1H, m, Py), 8.42-8.44 (1H, m, Py), 8.44-8.46 (1H, m, Py).  $^{13}\text{C}$  NMR ( $\text{CDCl}_3$ , 176

MHz):  $\delta_C$  16.49 (m, 2C), 27.86 (3C), 30.22 (d,  $J = 4.0$  Hz), 48.16 (d,  $J = 129.6$  Hz), 62.86 (d,  $J = 7.0$  Hz), 62.95 (d,  $J = 6.4$  Hz), 82.32, 123.33, 134.31 (d,  $J = 16.5$  Hz), 136.31, 148.23, 150.27, 167.16 (d,  $J = 5.0$  Hz).  $^{31}\text{P}$  NMR ( $\text{CDCl}_3$ , 283 MHz):  $\delta_P$  21.72 (s).

#### 1.4. 2-Chloro-*N*-phenethylacetamide (13)

(The procedure is based on a modified method from literature.<sup>5</sup> NMR signals correspond with literature data). The reaction was run under inert gas atmosphere (Ar). In a dried round-bottomed flask equipped with a septum 2-phenethylamine (200 mg, 1.65 mmol, 1 equiv) in 3 mL of dry dichloromethane was placed. Then, the mixture was cooled to  $-50^\circ\text{C}$ , and triethylamine (9.90 mmol, 3 equiv) and chloroacetyl chloride (373 mg, 3.30 mmol, 2 equiv) were added and the resulting reaction mixture was stirred for 1.5 h at  $-50^\circ\text{C}$ . Then, water was added and the mixture extracted with  $\text{CHCl}_3$  ( $3 \times 20$  mL) at pH 9. The combined extracts were dried ( $\text{MgSO}_4$ ) and concentrated to give the crude product. After washing the chloroform solution 3 times with water (acidified with 15% HCl; pH  $\approx 4$ –5) the pure product was obtained. Yield 315 mg (96%) from 200 mg (1.65 mmol) of 2-phenethylamine.

$^1\text{H}$ -NMR ( $\text{CDCl}_3$ , 250 MHz):  $\delta_H$  2.85 (1H, t,  $J = 7.0$  Hz, Ar-CH<sub>2</sub>-CH<sub>2</sub>), 3.57 (2H, td,  $J = 7.0$ , 5.9 Hz, Ar-CH<sub>2</sub>-CH<sub>2</sub>), 4.03 (2H, s, CH<sub>2</sub>-Cl), 6.60 (1H, bs, NH-CO), 7.15–7.40 (5H, m, CH<sub>Ar</sub>).

#### 1.5. 4-(Dimethylamino)-*N*-phenethylbut-2-enamide (12)

The reaction was run under inert gas atmosphere (Ar). In a dried round-bottomed flask equipped with a septum 4-(dimethylamino)-2-butenic acid hydrochloride (205 mg, 1.24 mmol, 1.5 equiv) in 1.5 mL of dry DMF was placed. Then, the mixture was cooled to  $-20^\circ\text{C}$  and HATU (1.24 mmol, 1.5 equiv) and DIPEA (1.24 mmol, 1.5 equiv) were added and the mixture stirred for 5 min. Then, 2-phenethylamine (100 mg, 0.82 mmol, 1 equiv) and DIPEA (1.24 mmol, 1.5 equiv) were added and the mixture warmed to rt and stirred overnight. The reaction was quenched by the addition of water and extracted with  $\text{CHCl}_3$  ( $3 \times 5$  mL). The combined extracts were dried ( $\text{MgSO}_4$ ) and concentrated to give the crude product, which was purified by flash column chromatography ( $\text{CHCl}_3/\text{MeOH}$  0–10 %). Yield 139 mg (73%) from 100 mg (0.82 mmol) of 2-phenethylamine.

$^1\text{H}$  NMR ( $\text{CD}_3\text{OD}$ , 700 MHz):  $\delta_H$  2.68 (6H, s, N-(CH<sub>3</sub>)<sub>2</sub>), 2.83 (2H, t,  $J = 7.4$  Hz, Ar-CH<sub>2</sub>-CH<sub>2</sub>), 3.49 (2H, t,  $J = 7.4$  Hz, Ar-CH<sub>2</sub>-CH<sub>2</sub>), 3.64 (2H, dd,  $J = 7.1$ , 1.4 Hz, CH<sub>2</sub>-N-(CH<sub>3</sub>)<sub>2</sub>), 6.23 (1H, dt,  $J = 15.3$ , 1.4 Hz, CO-CH=CH), 6.70 (1H, dt,  $J = 15.3$ , 7.1 Hz, CO-CH=CH), 7.17–7.20 (1H, m, CH<sub>Ar(4)</sub>), 7.20–7.23 (2H, m, CH<sub>Ar(3,5)</sub>), 7.25–7.29 (2H, m, CH<sub>Ar(2,6)</sub>).  $^{13}\text{C}$  NMR

(CD<sub>3</sub>OD, 176 MHz):  $\delta_C$  36.36 (Ar-CH<sub>2</sub>-CH<sub>2</sub>), 42.14 (Ar-CH<sub>2</sub>-CH<sub>2</sub>), 43.93 (2C, N-(CH<sub>3</sub>)<sub>2</sub>), 59.58 (CH<sub>2</sub>-N-(CH<sub>3</sub>)<sub>2</sub>), 127.40 (C<sub>Ar(4)</sub>), 129.50 (C<sub>Ar(2,6)</sub>), 129.76 (C<sub>Ar(3,5)</sub>), 131.78 (CO-CH=CH), 134.14 (CO-CH=CH), 140.35 (C<sub>Ar(1)</sub>), 166.79 (C=O). **LRMS** (APCI)  $m/z$ : [M + H]<sup>+</sup> Calcd for C<sub>14</sub>H<sub>20</sub>N<sub>2</sub>O 232.16; Found 232.9.

## 2. Synthesis of side products under McKenna reaction conditions

### 2.1. Synthesis of compounds 15–17

The reactions were run under inert gas atmosphere (Ar). In a dried round-bottomed flask equipped with a septum 4-nitro-*N*-(prop-2-yn-1-yl)benzamide (**10**, 0.245 mmol, 1 equiv) was placed and dissolved in dry ACN (50 mg/1.5 mL). Then, triethyl phosphonoacetate (0.245 mmol, 1 equiv) and H<sub>2</sub>O (0.490 mmol, 2 equiv) were subsequently added, followed by BTMS (2.94 mmol, 12 equiv). The septum was exchanged with a fitted glass stopper and additionally secured with parafilm. After 24 h in a 36 °C sand bath, the solution was evaporated and the mixture was subjected to solvolysis in acetone. After 5 min, the solvent was evaporated, the residue dissolved in CHCl<sub>3</sub> and extracted with NaHCO<sub>3</sub> (2 × 2.5 mL). The combined extracts were dried (MgSO<sub>4</sub>) and concentrated to give the crude product, which was purified by flash column chromatography (CH<sub>2</sub>Cl<sub>2</sub>).

**5-Methyl-2-(4-nitrophenyl)oxazole (15):**<sup>6</sup> **<sup>1</sup>H NMR** (CDCl<sub>3</sub>, 700 MHz):  $\delta_H$  2.43 (3H, d,  $J$  = 1.2 Hz, CH<sub>Ar(5)</sub>-CH<sub>3</sub>), 6.93 (1H, q,  $J$  = 1.2 Hz, CH<sub>Ar(4)</sub>), 8.12-8.16 (2H, m, CH<sub>Ar(2',6')</sub>), 8.27-8.30 (2H, m, CH<sub>Ar(3',5')</sub>). **<sup>13</sup>C NMR** (CDCl<sub>3</sub>, 176 MHz):  $\delta_C$  11.25 (C<sub>Ar(5)</sub>-CH<sub>3</sub>), 124.27 (C<sub>Ar(3',5')</sub>), 125.50 (C<sub>Ar(4)</sub>), 126.68 (C<sub>Ar(2',6')</sub>), 133.26 (C<sub>Ar(4')</sub>), 148.45 (C<sub>Ar(1')</sub>), 150.85 (C<sub>Ar(5)</sub>), 158.74 (C<sub>Ar(2)</sub>). **HRMS** (DART<sup>+</sup>)  $m/z$ : [M + H]<sup>+</sup> Calcd for C<sub>10</sub>H<sub>9</sub>N<sub>2</sub>O<sub>3</sub> 205.0608; Found 205.0609.

***N*-(2-Bromoallyl)-4-nitrobenzamide and *N*-(3-bromoallyl)-4-nitrobenzamide (16 and 17):** **<sup>1</sup>H NMR** (CDCl<sub>3</sub>, 700 MHz):  $\delta_H$  4.19 (2H, td,  $J$  = 6.0, 1.5 Hz, CO-NH-CH<sub>2</sub> (**17**)), 4.28 (2H, d,  $J$  = 6.0 Hz CO-NH-CH<sub>2</sub> (**16**)), 5.56 (1H, d,  $J$  = 2.2 Hz, CBr=CH<sub>2</sub>), 5.84-5.86 (1H, m, CBr=CH<sub>2</sub>), 6.29 (1H, q,  $J$  = 6.5 Hz, CH=CHBr), 6.33 (1H, dt,  $J$  = 7.1, 1.5 Hz, CH=CHBr), 7.12 (1H, t,  $J$  = 5.8 Hz, CO-NH (**17**)), 7.23 (1H, d,  $J$  = 6.2 Hz, CO-NH (**16**)), 7.92-7.99 (2H, m, CH<sub>Ar(2,6)</sub>), 8.19-8.25 (2H, m, CH<sub>Ar(3,5)</sub>). **<sup>13</sup>C NMR** (CDCl<sub>3</sub>, 176 MHz):  $\delta_C$  39.89 (CO-NH-CH<sub>2</sub> (**17**)), 48.10 (CO-NH-CH<sub>2</sub> (**16**)), 110.95 (CH=CHBr), 118.66 (CBr=CH<sub>2</sub>), 123.83, 123.88 (2s, C<sub>Ar(3)</sub> and C<sub>Ar(5)</sub>), 128.38, 128.45 (2s, C<sub>Ar(2)</sub> and C<sub>Ar(6)</sub>), 128.82 (CBr=CH<sub>2</sub>), 130.53 (CH=CHBr), 139.63, 139.76 (2s, C<sub>Ar(1)</sub> or C<sub>Ar(4)</sub>), 149.66, 149.76 (2s, C<sub>Ar(1)</sub> or C<sub>Ar(4)</sub>), 165.63 (s, CO (**17**)),



165.85 (s, CO (**16**)). **HRMS** (DART+)  $m/z$ :  $[M + H]^+$  Calcd for  $C_{10}H_{10}N_2O_3Br$  284.9869; Found 284.9874.

## 2.2. 3-Bromo-*N*-phenethylpropanamide (**18**)

The reaction was run under inert gas atmosphere (Ar). In a dried round-bottomed flask equipped with a septum *N*-phenethylacrylamide (**11**, 0.285 mmol, 1 equiv) was placed and dissolved in dry ACN (50 mg/1.5 mL). Then, triethyl phosphonoacetate (0.285 mmol, 1 equiv) and  $H_2O$  (0.143 mmol, 0.5 equiv) were subsequently added, followed by BTMS (not distilled, 3.42 mmol, 12 equiv). The septum was exchanged with a fitted glass stopper and additionally secured with parafilm. After 24 h in a 36 °C sand bath the solution was evaporated and the mixture was subjected to solvolysis in acetone. After 5 min, the solvent was evaporated, the residue dissolved in  $CHCl_3$  and extracted with  $NaHCO_3$  ( $2 \times 2.5$  mL). The extract was dried ( $MgSO_4$ ) and concentrated to give the crude product, which was purified by flash column chromatography (DCM/acetone 0–10%).

**$^1H$  NMR** ( $CDCl_3$ , 700 MHz):  $\delta_H$  2.69 (2H, t,  $J = 6.6$  Hz,  $CO-CH_2-CH_2Br$ ), 2.83 (2H, t,  $J = 7.0$  Hz,  $Ph-CH_2-CH_2$ ), 3.54 (2H, td,  $J = 7.0, 5.9$  Hz,  $Ph-CH_2-CH_2$ ), 3.61 (2H, t,  $J = 6.6$  Hz,  $CO-CH_2-CH_2Br$ ), 5.75 (1H, br s,  $NH-CO$ ), 7.20 (2H, br d,  $J = 6.6$  Hz,  $CH_{Ar(2,6)}$ ), 7.23, (1H, br t,  $J = 7.4$  Hz,  $CH_{Ar(4)}$ ), 7.31 (2H, br t,  $J = 7.6$  Hz,  $CH_{Ar(3,5)}$ ).  **$^{13}C$  NMR** ( $CDCl_3$ , 176 MHz):  $\delta_C$  27.58 ( $CO-CH_2-CH_2Br$ ), 35.71 ( $Ph-CH_2-CH_2$ ), 39.85 ( $CO-CH_2-CH_2Br$ ), 40.89 ( $Ph-CH_2-CH_2$ ), 126.68 ( $C_{Ar(4)}$ ), 128.77 ( $C_{Ar(3,5)}$ ), 128.88 ( $C_{Ar(2,6)}$ ), 138.80 ( $C_{Ar(1)}$ ), 169.71 (CO). **HRMS** (DART+)  $m/z$ :  $[M + H]^+$  Calcd for  $C_{11}H_{15}NOBr$  256.0332; Found 256.0328.

## 2.3. 3-(3-Ethoxy-2-fluoro-3-oxo-2-phosphonopropyl)-1-ethylpyridin-1-ium (**20**)

The reaction was run under inert gas atmosphere (Ar). In a dried round-bottomed flask equipped with a septum ethyl 2-(diethoxyphosphoryl)-2-fluoro-3-(pyridin-3-yl)propanoate (**9d**, 0.51 mmol, 1 equiv) was placed and dissolved in dry ACN (170 mg/5 mL). Then, BTMS (3.06 mmol, 6 equiv) was added and the septum was exchanged with a fitted glass stopper and additionally secured with parafilm. After 13 days in a 36 °C sand bath the solution was evaporated and the mixture was subjected to solvolysis in EtOH. After 5 min, the solvent was evaporated to give the crude product, which was purified by HPLC (95%  $H_2O$  + 5% ACN + 0.2% TFA buffer, isocratic).

**$^1H$  NMR** ( $D_2O$ , 700 MHz,  $pH \approx 2-3$ ):  $\delta_H$  1.21 (3H, t,  $J = 7.1$  Hz,  $O-CH_2-CH_3$ ), 1.62 (3H, t,  $J = 7.4$  Hz,  $N-CH_2-CH_3$ ), 3.64-3.80 (2H, m,  $CH_2-CF$ ), 4.20-4.28 (2H, m,  $O-CH_2-CH_3$ ), 4.59-4.67

(2H, m, N-CH<sub>2</sub>-CH<sub>3</sub>), 8.01 (dd, 1H,  $J = 8.1, 6.16$  Hz, CH<sub>Ar(5)</sub>), 8.43 (d, 1H,  $J = 8.2$  Hz, CH<sub>Ar(4)</sub>), 8.79 (dt, 1H,  $J = 6.2, 1.3$  Hz, CH<sub>Ar(2)</sub>), 8.83 (d, 1H,  $J = 1.9$  Hz, CH<sub>Ar(6)</sub>). **<sup>13</sup>C NMR** (D<sub>2</sub>O, 176 MHz, pH  $\approx$  2-3):  $\delta_C$  13.33 (O-CH<sub>2</sub>-CH<sub>3</sub>), 15.70 (N-CH<sub>2</sub>-CH<sub>3</sub>), 36.05 (d,  $J_{FC} = 19.8$  Hz, CH<sub>2</sub>-CF), 57.44 (N-CH<sub>2</sub>-CH<sub>3</sub>), 63.66 (O-CH<sub>2</sub>-CH<sub>3</sub>), 95.87 (dd,  $J_{FC} = 194.6$  Hz,  $J_{PC} = 145.5$  Hz, CH<sub>2</sub>-CF), 127.94 (C<sub>Ar(5)</sub>), 136.19 (d,  $J_{FC} = 11.7$  Hz, C<sub>Ar(3)</sub>), 142.95 (C<sub>Ar(6)</sub>), 144.52 (C<sub>Ar(2)</sub>), 146.8 (C<sub>Ar(4)</sub>), 169.63 (dd,  $J_{FC} = 23.3$  Hz,  $J_{PC} = 2.7$  Hz, -COOEt). **<sup>31</sup>P NMR** (D<sub>2</sub>O, 283 MHz, pH  $\approx$  2-3)  $\delta_P$  6.31 (d,  $J_{PF} = 71.3$  Hz). **LRMS** (ESI)  $m/z$ : [M]<sup>+</sup> Calcd for C<sub>12</sub>H<sub>18</sub>FNO<sub>5</sub>P 306.09; Found 305.9.

## 2.4. 2-Bromo-*N*-phenethylacetamide (22)

The reaction was run under inert gas atmosphere (Ar). In a dried round-bottomed flask equipped with a septum 2-chloro-*N*-phenethylacetamide (**13**, 0.051 mmol, 1 equiv) was placed and dissolved in dry CDCl<sub>3</sub> (10.1 mg/0.5 mL). Then, BTMS (0.306 mmol, 6 equiv) was added and the septum was exchanged with a fitted glass stopper and additionally secured with parafilm. After 24 h in a 36 °C sand bath the solution was evaporated and the mixture was subjected to solvolysis in acetone. After 5 min the solvent was evaporated.

**<sup>1</sup>H NMR** (CDCl<sub>3</sub>, 700 MHz):<sup>8</sup>  $\delta_H$  2.90 (2H, t,  $J = 7.1$  Hz, Ph-CH<sub>2</sub>-CH<sub>2</sub>), 3.58 (2H, br m, Ph-CH<sub>2</sub>-CH<sub>2</sub>), 4.03 (2H, s, CH<sub>2</sub>Br), 7.18-7.25 (3H, m, CH<sub>Ar(3,5)</sub> and CH<sub>Ar(4)</sub>), 7.28-7.33 (2H, m, CH<sub>Ar(2,6)</sub>). **<sup>13</sup>C NMR** (CDCl<sub>3</sub>, 176 MHz):  $\delta_C$  27.48 (CH<sub>2</sub>Br), 35.03 (Ph-CH<sub>2</sub>-CH<sub>2</sub>), 42.32 (Ph-CH<sub>2</sub>-CH<sub>2</sub>), 126.95 (C<sub>Ar(4)</sub>), 128.87 and 128.89 (2s, C<sub>Ar(2,6)</sub> and C<sub>Ar(3,5)</sub>), 137.92 (C<sub>Ar(1)</sub>), 168.12 (CO). **HRMS** (DART<sup>+</sup>)  $m/z$ : [M + H]<sup>+</sup> Calcd for C<sub>10</sub>H<sub>13</sub>NOBr 242.0175; Found 242.0181.

## 2.5. *N*-Ethyl-*N,N*-dimethyl-4-oxo-4-(phenethylamino)but-2-en-1-aminium (21)

The reaction was run under inert gas atmosphere (Ar). In a dried round-bottomed flask equipped with a septum 4-(dimethylamino)-*N*-phenethylbut-2-enamide (**12**, crude product, without purification, 0.258 mmol, 1 equiv) was placed and dissolved in dry ACN (60 mg/2 mL). Then, *tert*-butyl diethylphosphonoacetate (0.258 mmol, 1 equiv) and TEA (20.02 mmol, 10 equiv) were subsequently added, followed by BTMS (not distilled, 20.02 mmol, 10 equiv). The septum was exchanged with a fitted glass stopper and additionally secured with parafilm. After 24 h in a 36 °C sand bath the solution was evaporated and the mixture was subjected to solvolysis in EtOH. After 5 min the solvent was evaporated and the mixture purified by HPLC (A: 95% H<sub>2</sub>O + 5% ACN + 0.2% TFA; B: 95% ACN + 5% H<sub>2</sub>O + 0.2% TFA, gradient 5→30 min 0→90% B, compound **21** was collected after 15 min.

**<sup>1</sup>H NMR** (CD<sub>3</sub>OD, 700 MHz): δ<sub>H</sub> 1.39 (3H, t, *J* = 7.3 Hz, N-CH<sub>2</sub>-CH<sub>3</sub>), 2.85 (2H, t, *J* = 7.3 Hz, Ar-CH<sub>2</sub>-CH<sub>2</sub>), 3.07 (6H, s, N-(CH<sub>3</sub>)<sub>2</sub>), 3.41 (2H, q, *J* = 7.3 Hz, N-CH<sub>2</sub>-CH<sub>3</sub>), 3.52 (2H, t, *J* = 7.4 Hz, Ar-CH<sub>2</sub>-CH<sub>2</sub>), 4.09 (2H, d, *J* = 6.4 Hz, CH<sub>2</sub>-N-(CH<sub>3</sub>)<sub>2</sub>), 6.39-6.43 (1H, m, CO-CH=CH), 6.77 (1H, dt, *J* = 15.1, 7.5 Hz, CO-CH=CH), 7.17-7.24 (3H, m, CH<sub>Ar(4)</sub> and CH<sub>Ar(3,5)</sub>), 7.25-7.30 (2H, m, CH<sub>Ar(2,6)</sub>). **<sup>13</sup>C NMR** (CD<sub>3</sub>OD, 176 MHz): δ<sub>C</sub> 8.37 (N-CH<sub>2</sub>-CH<sub>3</sub>), 36.30 (Ar-CH<sub>2</sub>-CH<sub>2</sub>), 42.40 (Ar-CH<sub>2</sub>-CH<sub>2</sub>), 50.55 (2C, t, *J* = 3.8 Hz, N-(CH<sub>3</sub>)<sub>2</sub>), 61.21 (N-CH<sub>2</sub>-CH<sub>3</sub>), 64.79 (CH<sub>2</sub>-N-(CH<sub>3</sub>)<sub>2</sub>), 127.45 (C<sub>Ar(4)</sub>), 129.01 (CO-CH=CH), 129.52 (C<sub>Ar(2,6)</sub>), 129.76 (C<sub>Ar(3,5)</sub>), 135.93 (CO-CH=CH), 140.29 (C<sub>Ar(1)</sub>), 166.13 (C=O). **HRMS** (DART+) *m/z*: [M + H]<sup>+</sup> Calcd for C<sub>16</sub>H<sub>25</sub>N<sub>2</sub>O 261.1961; Found 261.1962.

### 3. NMR Spectra of side products generated under Mc Kenna reaction conditions

#### 3.1. Compounds 15–17

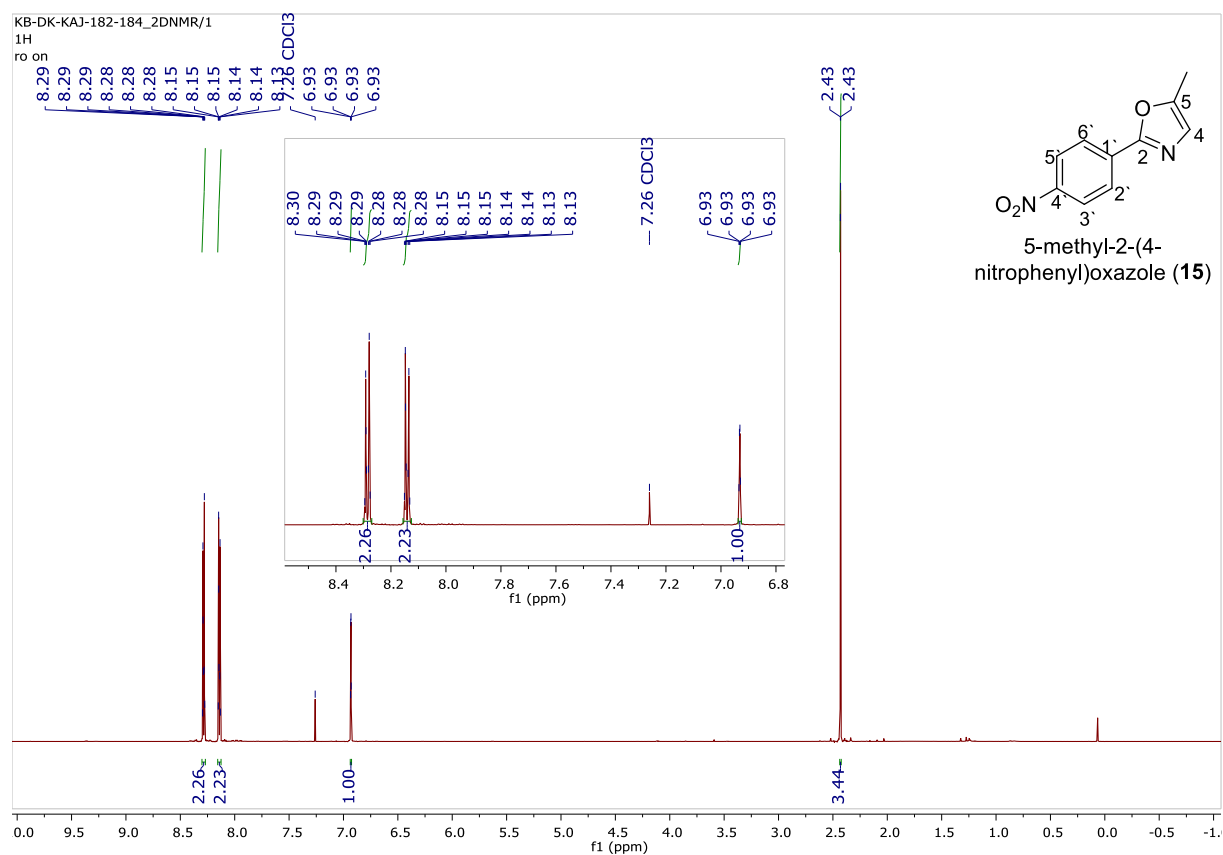

**Figure S1:** <sup>1</sup>H NMR of compound **15** (CDCl<sub>3</sub>, 700 MHz).

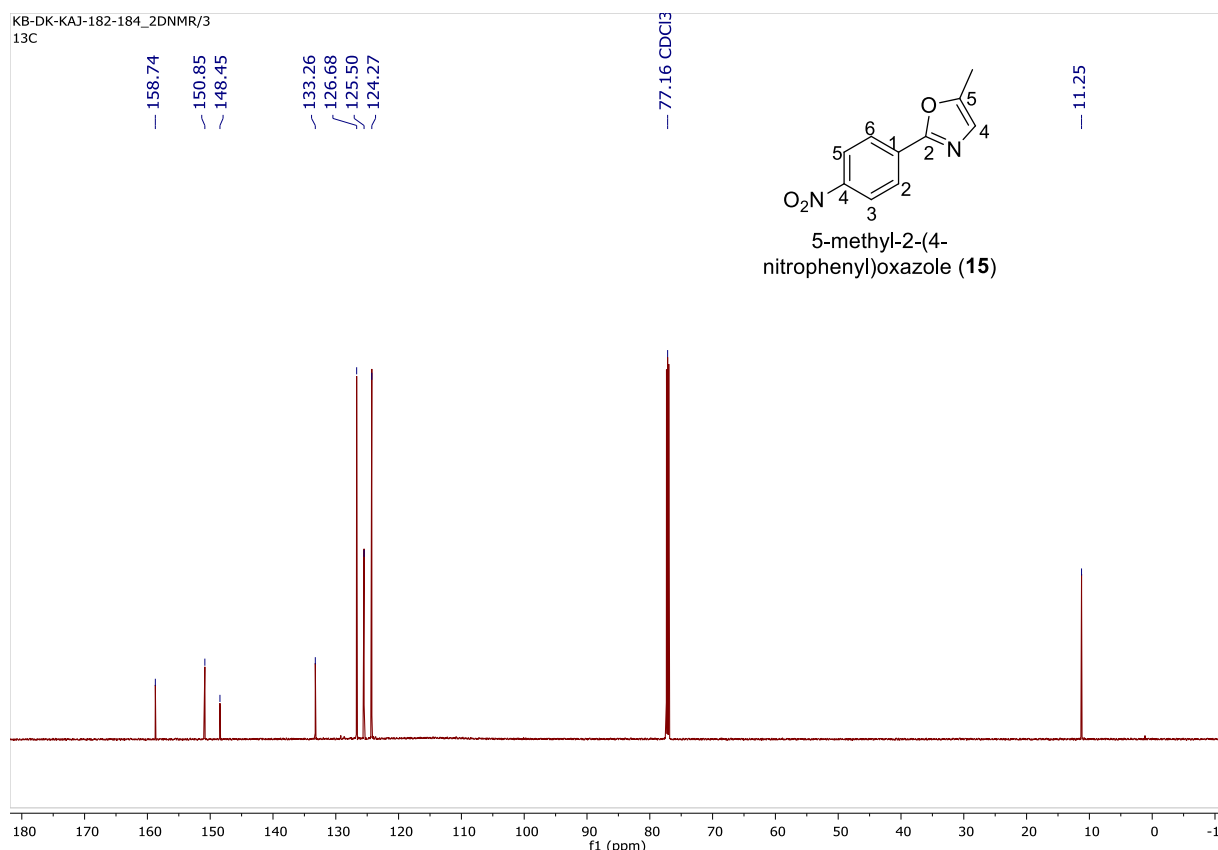

**Figure S2:** <sup>13</sup>C NMR of compound **15** (CDCl<sub>3</sub>, 176 MHz).

### 3.1.1. X-ray Crystallography of compound **15**

X-ray data of single crystals of the title compound were measured on an APEX II CCD X-ray diffractometer using graphite-monochromated CuK $\alpha$  radiation ( $\lambda = 1.54184$  Å). Data were collected using the APEX-II software<sup>9</sup>, integrated using SAINT<sup>10</sup> and corrected for absorption using the multi-scan approach (SADABS).<sup>11</sup> Final cell constants were determined from full least squares refinements of all observed reflections. The structures were solved using intrinsic phasing (SHELXT)<sup>12</sup> and refined with full squares refinement on F<sup>2</sup> using the SHELXTL software.<sup>13,14</sup> All hydrogen atoms were added at calculated positions and refined isotropically with a riding model. A thermal ellipsoid plot of the title compound is given in Figure S3. A summary of the experimental crystallographic data is presented in Table S1. The crystallographic data (CCDC 1919198) have been deposited in the Cambridge Crystallographic Data Base.

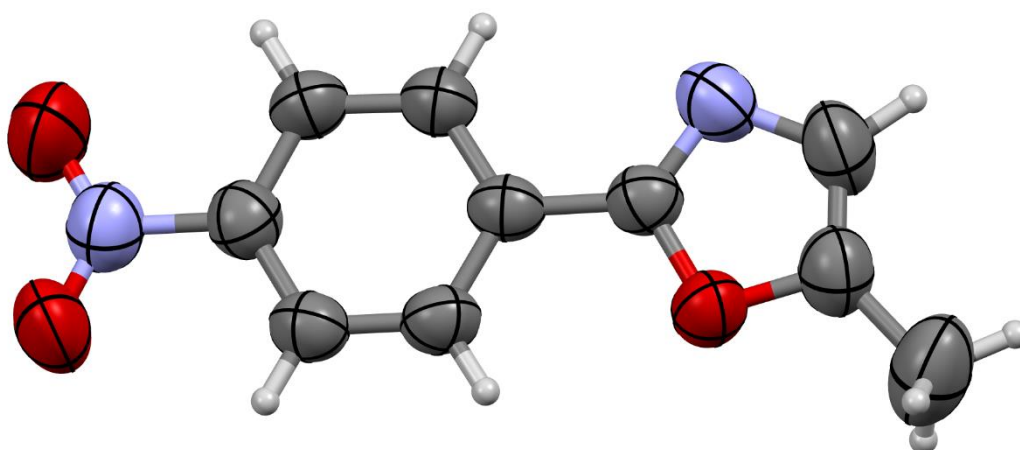

**Figure S3:** Molecular structure of **15** from X-ray crystallographic analysis. (Thermal ellipsoids are shown at the 50% probability level.)

**Table S1.** Crystal and structure refinement data.

|                                                   |                                                                                                                     |
|---------------------------------------------------|---------------------------------------------------------------------------------------------------------------------|
| Formula                                           | C <sub>10</sub> H <sub>8</sub> N <sub>2</sub> O <sub>3</sub>                                                        |
| CCDC no.                                          | 1919198                                                                                                             |
| Formula weigh                                     | 204.18                                                                                                              |
| Temperature, [K]                                  | 298                                                                                                                 |
| Wavelength, [Å]                                   | CuK $\alpha$                                                                                                        |
| Crystal system                                    | triclinic                                                                                                           |
| Space group                                       | <i>P</i> 1                                                                                                          |
| Unit cell dimensions, [Å, °]                      | a= 3.9699(2)<br>b= 5.9126(2)<br>c=10.7094(7)<br>$\alpha$ = 98.052(4)<br>$\beta$ = 99.989(5)<br>$\gamma$ = 91.441(4) |
| Volume, [Å <sup>3</sup> ]                         | 244.81(2)                                                                                                           |
| Z                                                 | 1                                                                                                                   |
| Calculated density, [g cm <sup>3</sup> ]          | 1.385                                                                                                               |
| Absorption coefficient [mm <sup>-1</sup> ]        | 0.883                                                                                                               |
| $\theta$ range for data collection [°]            | 4.2 - 66.6                                                                                                          |
| Limiting indices (h, k, l)                        | -4/4, -7/7, -12/12                                                                                                  |
| Reflections collected/unique                      | 3570/1560                                                                                                           |
| Data/restraints/parameters                        | 1560/0/138                                                                                                          |
| R <sub>int</sub>                                  | 0.013                                                                                                               |
| Goodness-of-fit on F <sup>2</sup>                 | 1.27                                                                                                                |
| R[F <sup>2</sup> > 2(F <sup>2</sup> )]            | 0.0751                                                                                                              |
| R (all data)                                      | 0.0888                                                                                                              |
| wR[F <sup>2</sup> > 2(F <sup>2</sup> )]           | 0.254                                                                                                               |
| Largest diff. peak and hole, [e Å <sup>-3</sup> ] | -0.37, 0.49                                                                                                         |

# Note

Since compounds **16** and **17** were isolated as mixture, for the description of NMR data symbols (**16** and **17**) were used whenever distinction was possible. When two complementary signals overlapped, no distinction was made.

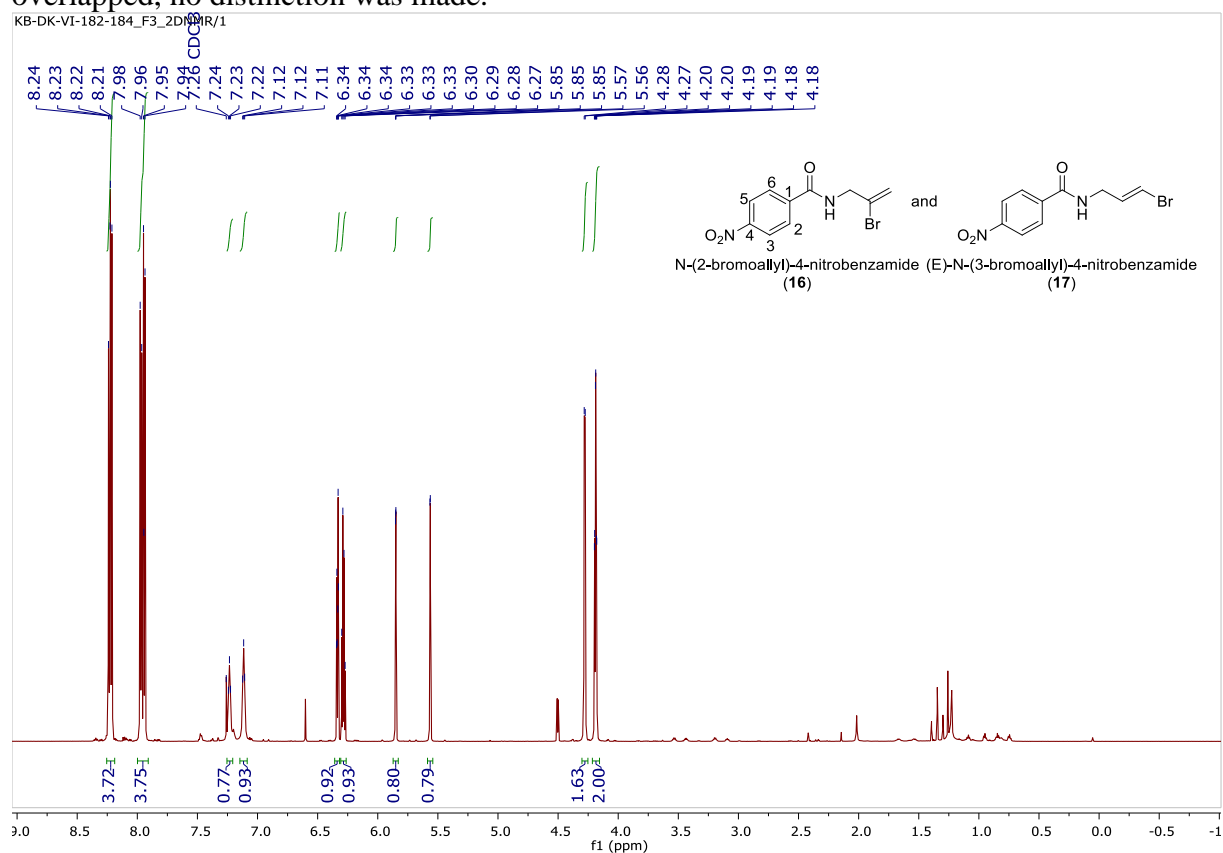

**Figure S4:**  $^1\text{H}$  NMR of compound **16** and **17** ( $\text{CDCl}_3$ , 700 MHz).

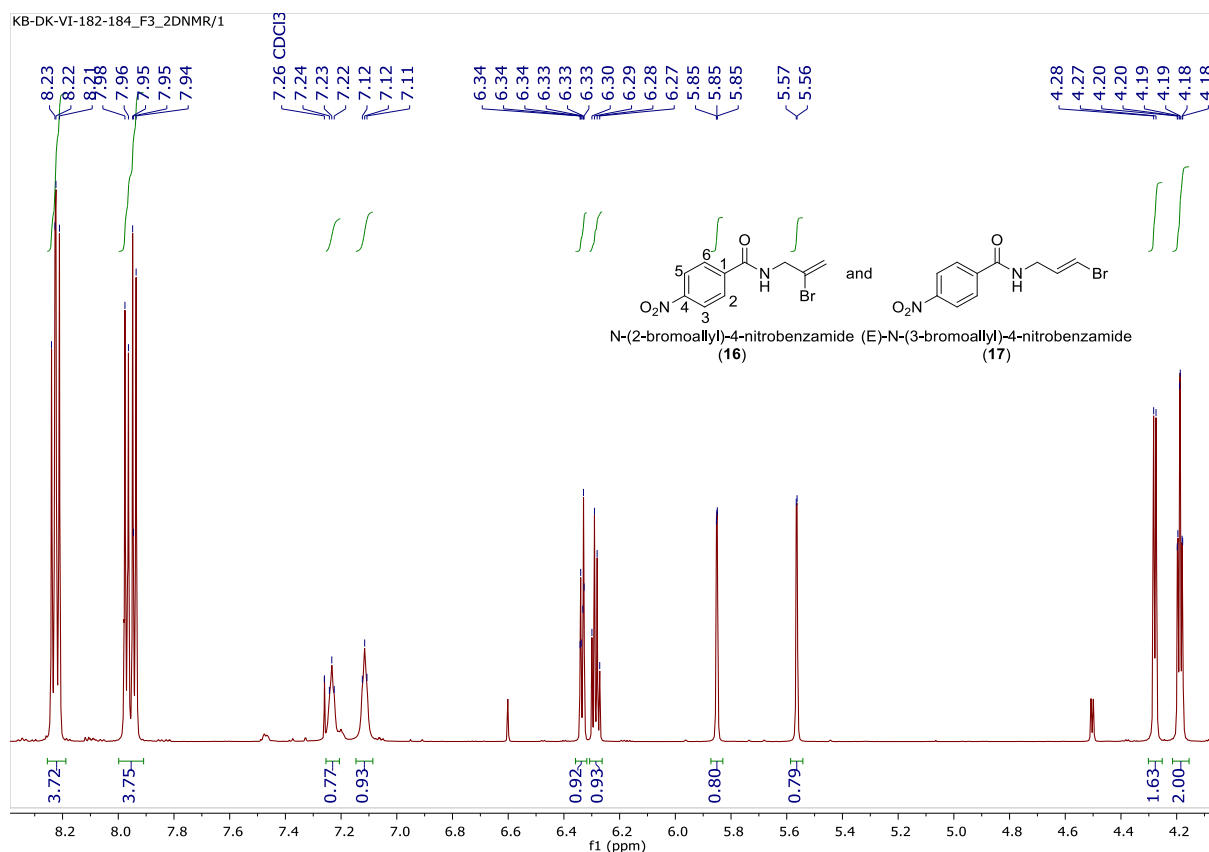

**Figure S5:** <sup>1</sup>H NMR of compound **16** and **17** (CDCl<sub>3</sub>, 700 MHz): zoom in of the range 4.2–8.2.

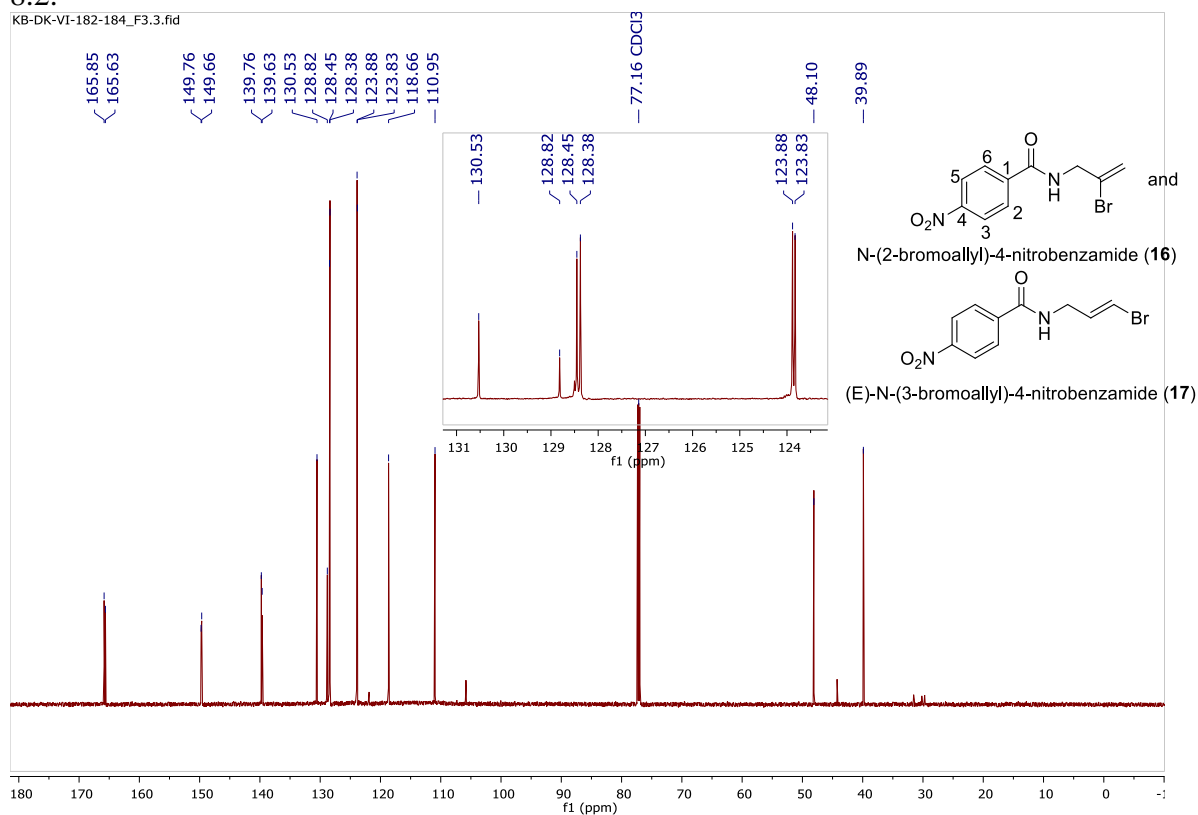

**Figure S6:** <sup>13</sup>C NMR of compound **16** and **17** (CDCl<sub>3</sub>, 176 MHz).



### 3.2. Optimization of oxazole synthesis

In the first approach we generated HBr by the reaction between equimolar amounts of BTMS and water (0.5:0.5 and 3:3) (Table S2, entry 2 and 3). We obtained mixture of products and substrate, achieving higher conversion for the 3:3 molar ratio of reagents.

Next, we excluded BTMS from the reaction and used 33% HBr in AcOH or 40% HBr in H<sub>2</sub>O, respectively. The application of the HBr solution in AcOH led again to a mixture of products **15–17** and the substrate (Table S2, entries 4–6), while using solely hydrobromic acid (40%) led to recovery of the substrate (Table S2, entry 7).

To exclude the formation of products by HBr addition, we applied non-HBr containing acids: HCl, TFA, and AcOH. However, in all cases we isolated only the starting compound **10** (Table S2, entries 8–11).

**Table S2:** Optimization of the oxazole synthesis.<sup>a</sup>

| Entry                 | PC <sup>b</sup> | Acid (eq)                         | Additive (eq)           | <b>10:15:16:17</b>  |
|-----------------------|-----------------|-----------------------------------|-------------------------|---------------------|
| <b>1.</b>             | +               | BTMS (0.5)                        | -                       | 0.96:0.04:0:0       |
| <b>2.</b>             | +               | BTMS (0.5)                        | H <sub>2</sub> O (0.5)  | 0.7:0.27:0.01:0.02  |
| <b>3.</b>             | -               | BTMS (3)                          | H <sub>2</sub> O (3)    | 0.13:0.64:0.13:0.10 |
| <b>4.</b>             | +               | 33 % HBr in AcOH (1)              | -                       | 0.67:0.27:0.03:0.03 |
| <b>5.</b>             | +               | 33 % HBr in AcOH (10)             | -                       | 0,18:0,51:0,12:0,19 |
| <b>6.</b>             | +               | 33 % HBr in AcOH (1)              | H <sub>2</sub> O (1)    | 0.34:0.54:0.08:0.04 |
| <b>7.</b>             | +               | 40 % HBr in H <sub>2</sub> O (10) | -                       | 0,99:0,01:0:0       |
| <b>8.<sup>c</sup></b> | -               | AcOH (1)                          | D <sub>2</sub> O (2)    | n.r.                |
| <b>9.</b>             | -               | TFA (1.28)                        | -                       | n.r.                |
| <b>10.</b>            | -               | TFA (1.28)                        | H <sub>2</sub> O (1.28) | n.r.                |
| <b>11</b>             | -               | HCl (sat) (5 µl)                  | -                       | n.r.                |

<sup>a</sup>All reactions were carried out in ACN; the reaction was run at 35 °C for 24 h. n.r.: no reaction; <sup>b</sup>triethyl phosphonoacetate was used; <sup>c</sup>ACN-*d*<sub>3</sub> was used, because of the NMR control of this reaction.

### 3.3 Compound 18<sup>15</sup>

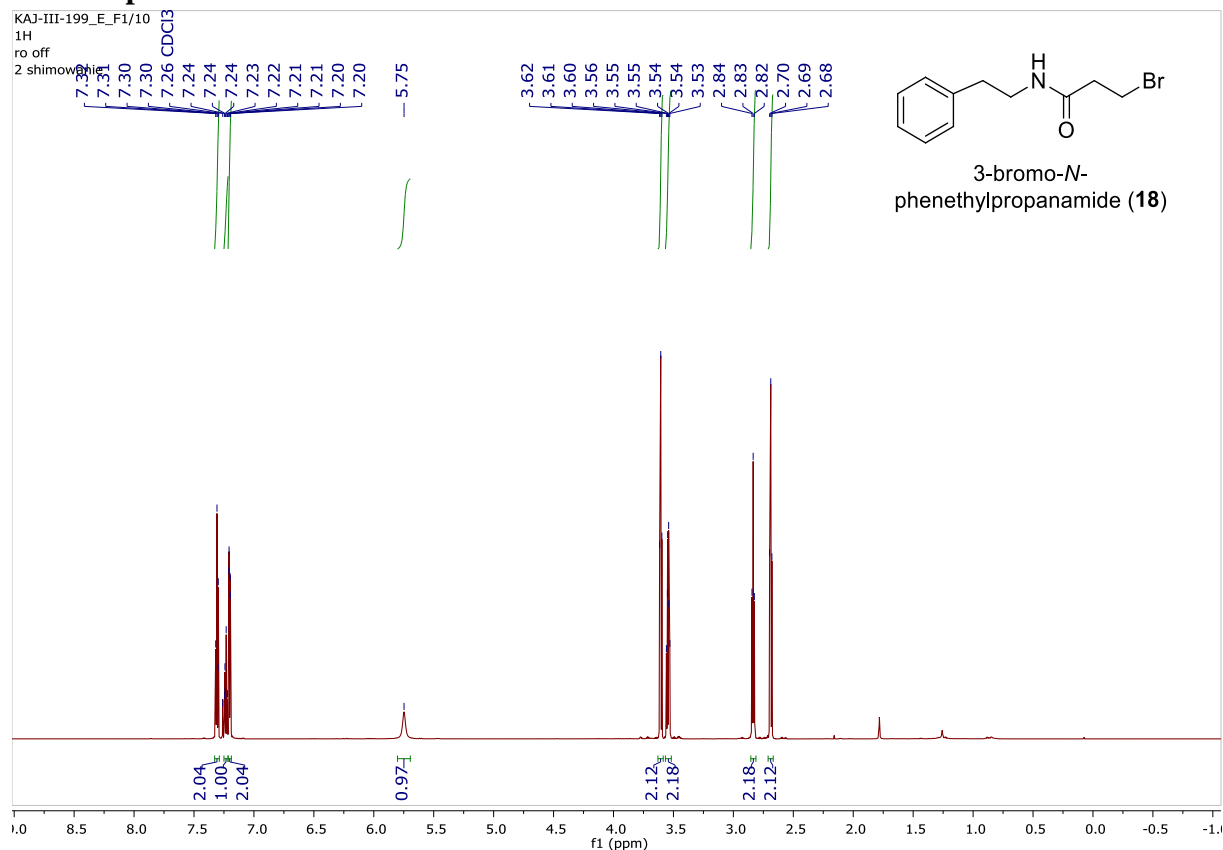

**Figure S7:** <sup>1</sup>H NMR of compound **18** (CDCl<sub>3</sub>, 700 MHz).

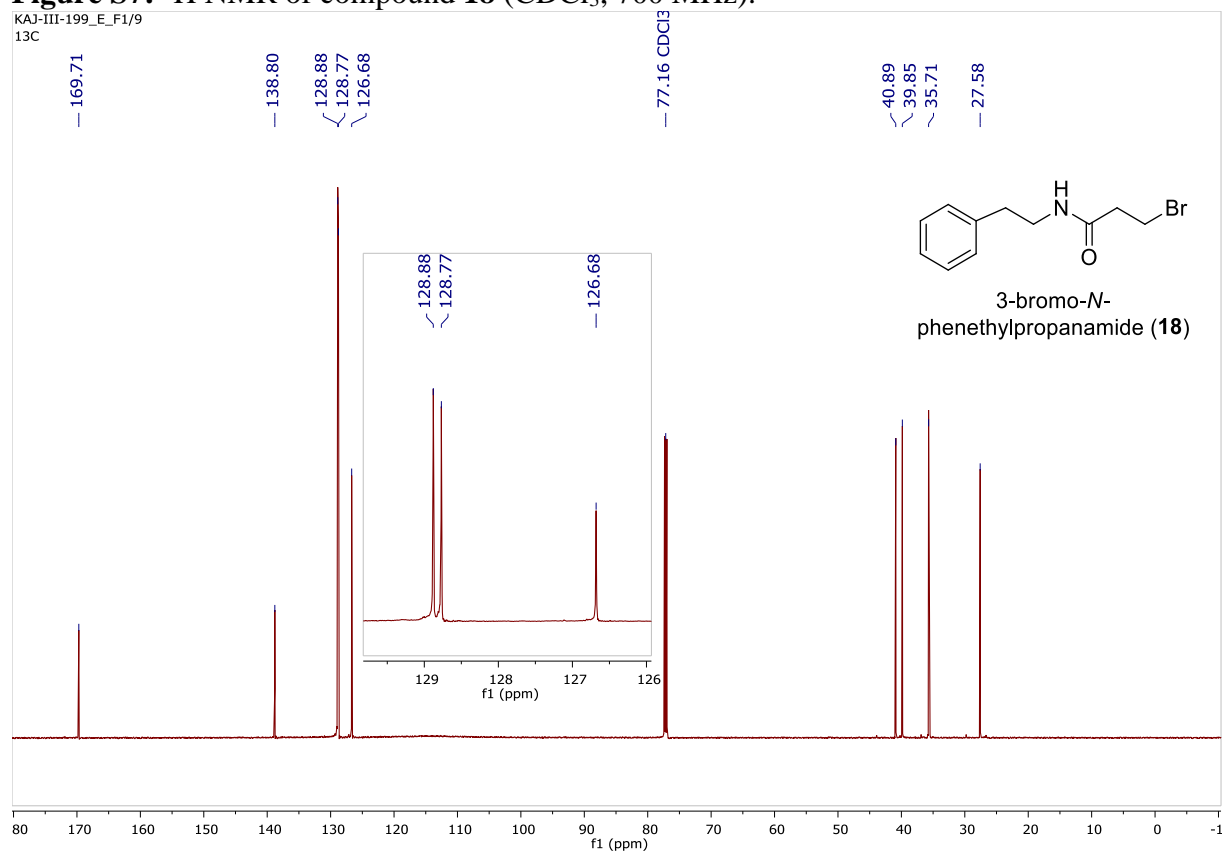

**Figure S8:** <sup>13</sup>C NMR of compound **18** (CDCl<sub>3</sub>, 176 MHz).

### 3.4 Compound 20

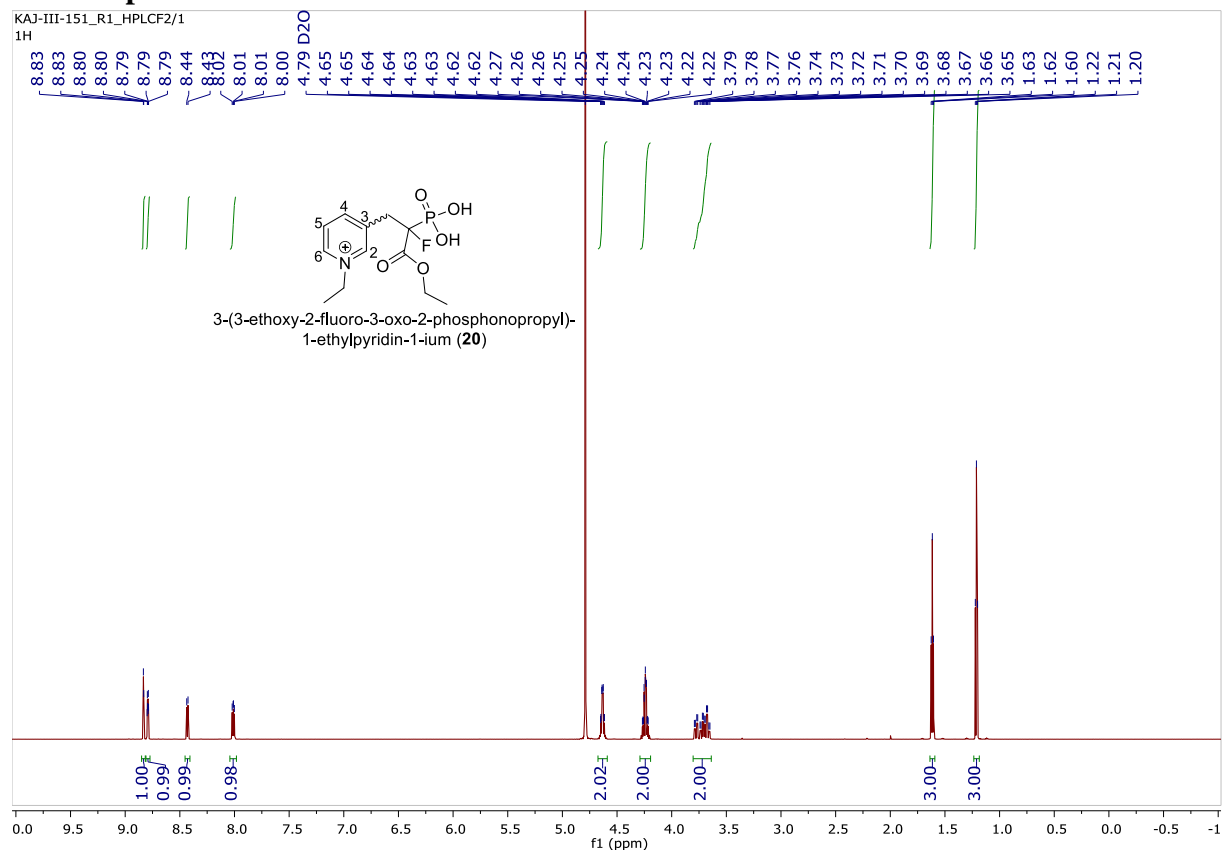

**Figure S9:**  $^1\text{H}$  NMR of compound **20** ( $\text{CDCl}_3$ , 700 MHz).

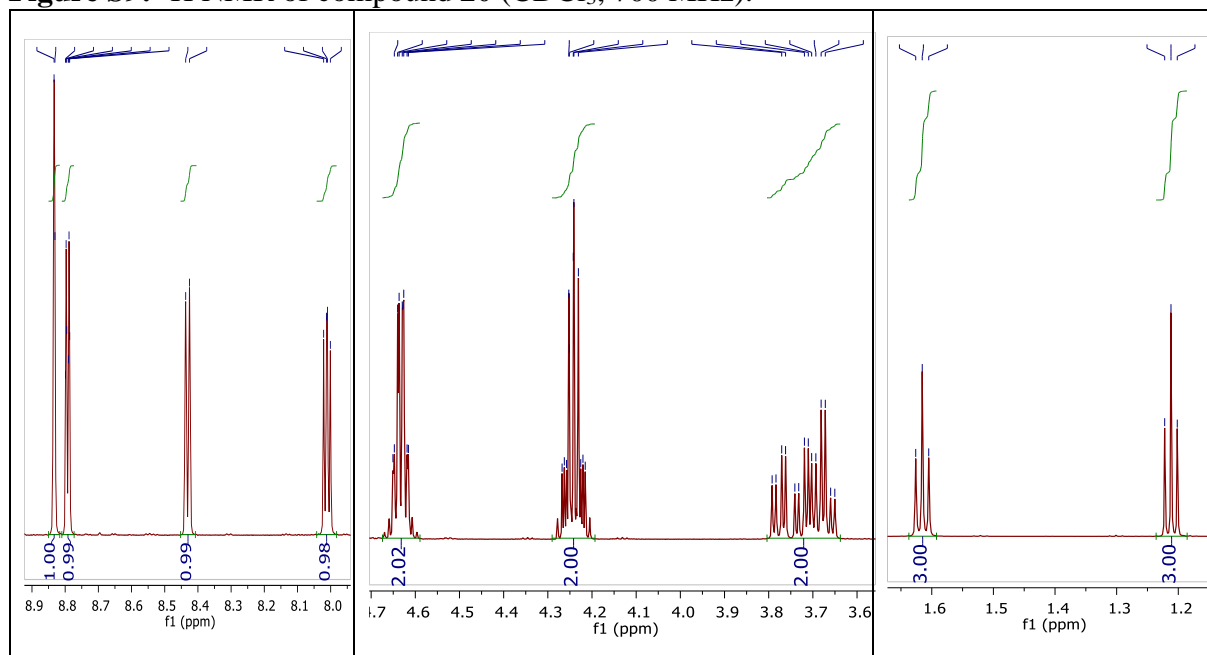

**Figure S10:**  $^1\text{H}$  NMR of compound **20** ( $\text{CDCl}_3$ , 700 MHz): zoom in of the ranges 1.1–1.7, 3.6–4.8, and 7.9–8.9 ppm.

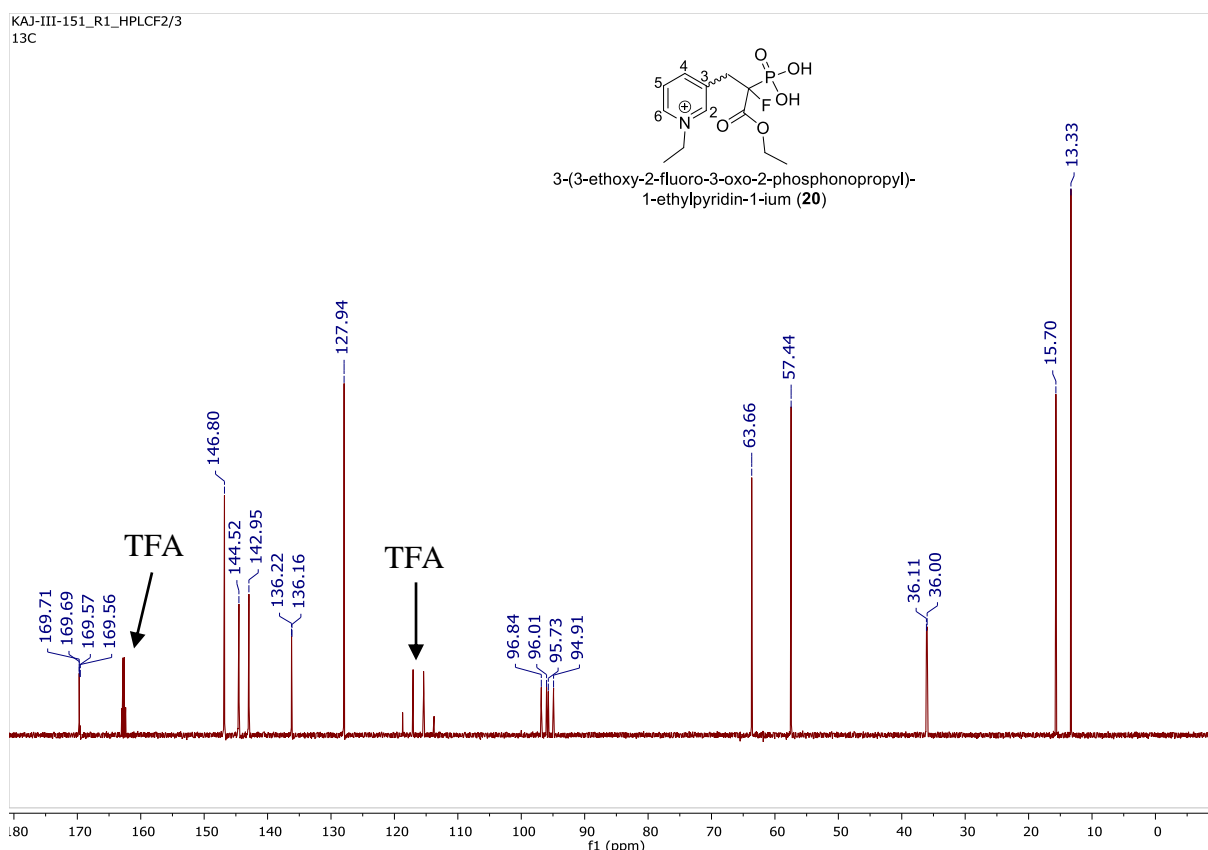

**Figure S11:**  $^{13}\text{C}$  NMR of compound **20** ( $\text{CDCl}_3$ , 176 MHz).

Note: Compound **20** was purified by HPLC using 95%  $\text{H}_2\text{O}$  + 5% ACN + 0.2% TFA buffer. The signals of residual TFA were identified in the  $^{13}\text{C}$  NMR spectrum.

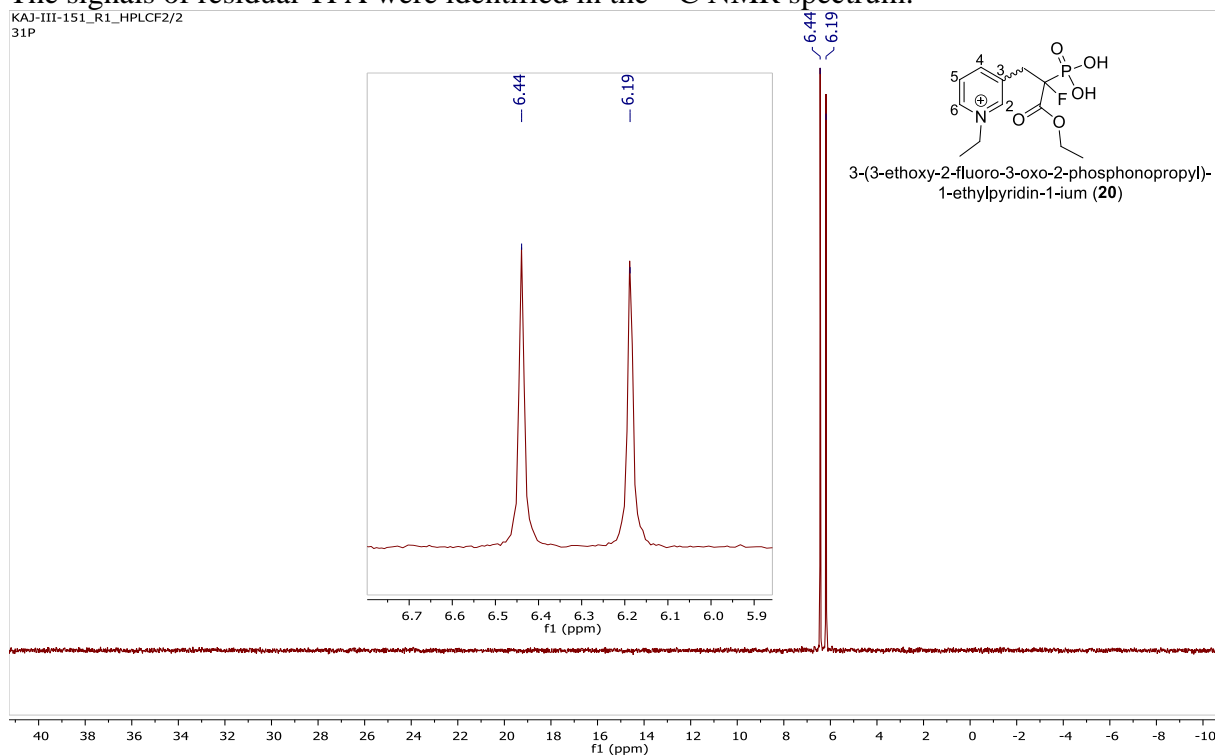

**Figure S12:**  $^{31}\text{P}$  NMR of compound **20** ( $\text{CDCl}_3$ , 283 MHz).

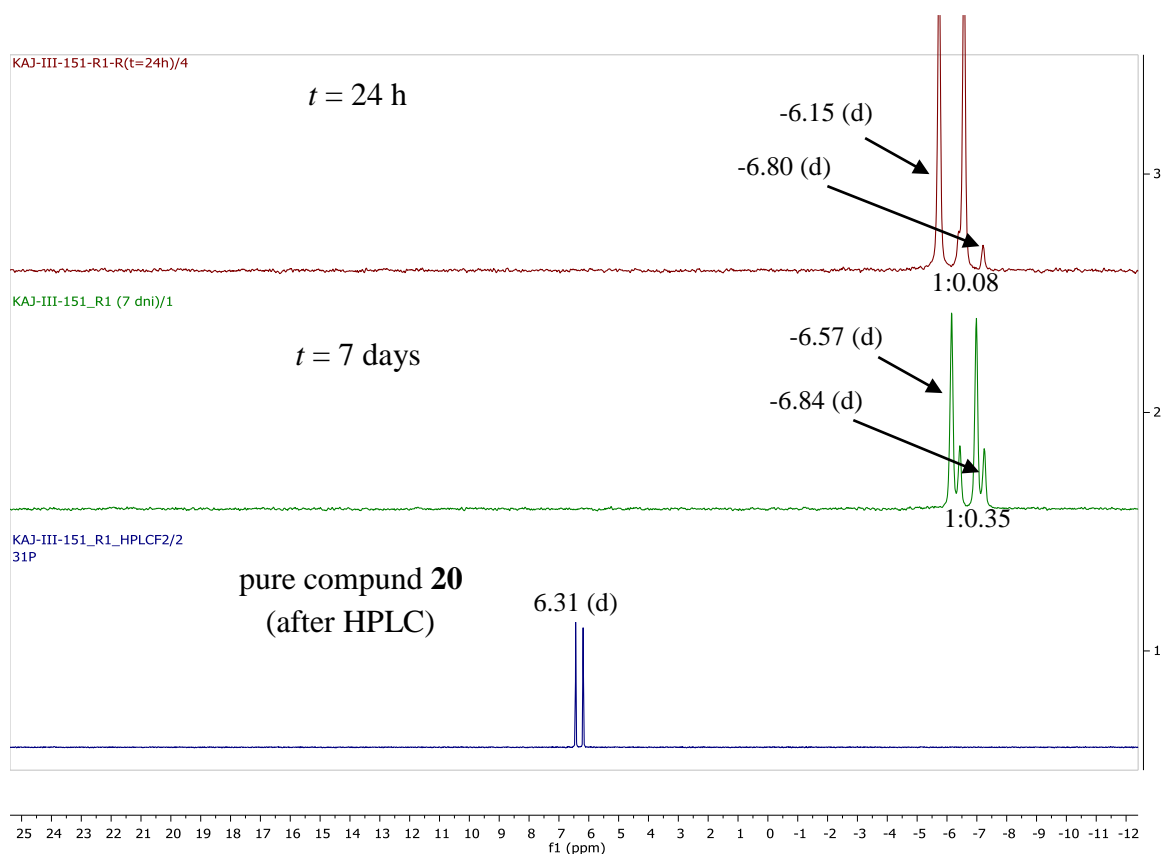

**Figure S13:** Top and middle: Monitoring of the alkylation reaction progress for compound **9b** at the first stage of the McKenna reaction (BTMS stage); top:  $^{31}\text{P}$  NMR after 24 h; middle:  $^{31}\text{P}$  NMR after 7 days. Bottom:  $^{31}\text{P}$  NMR spectrum of the alkylation product **20** after solvolysis and HPLC purification.

### 3.5 Compound 22

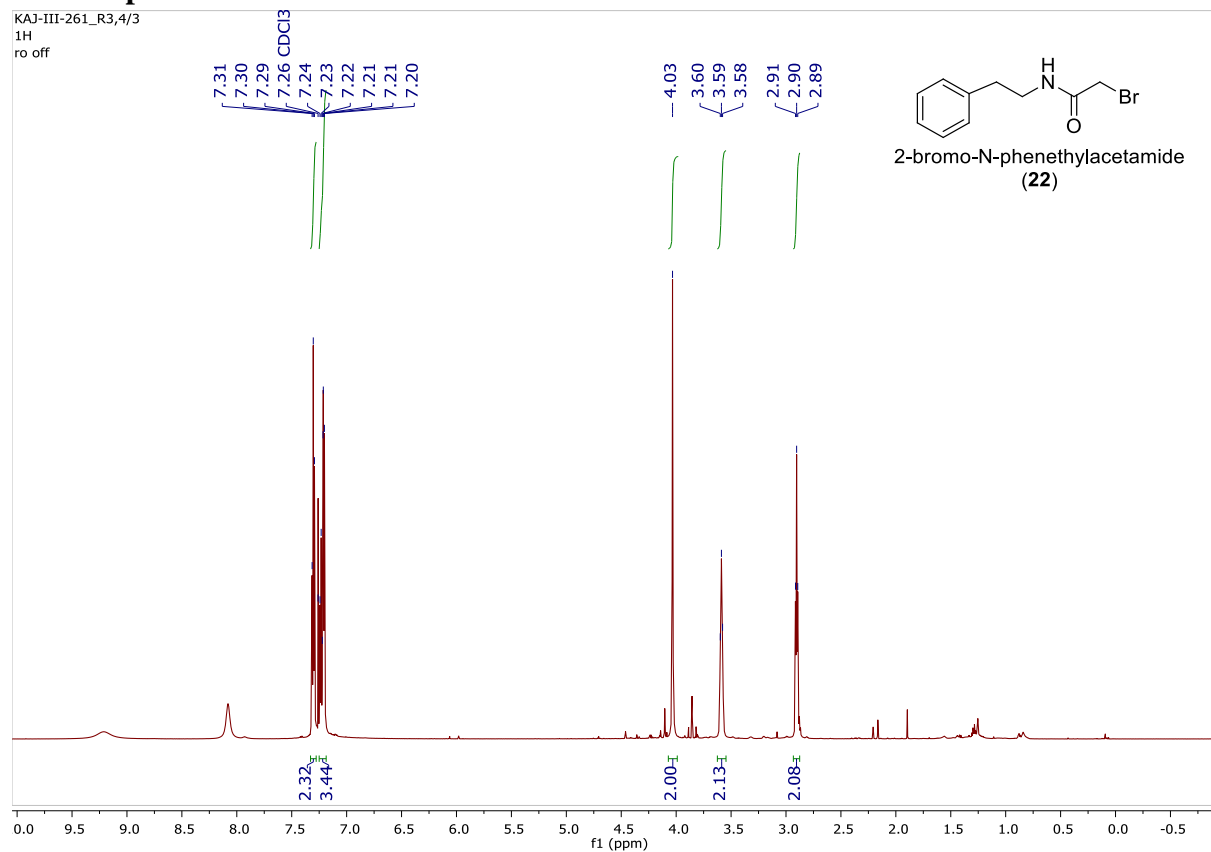

**Figure S14:**  $^1\text{H}$  NMR of compound **22** ( $\text{CDCl}_3$ , 700 MHz).

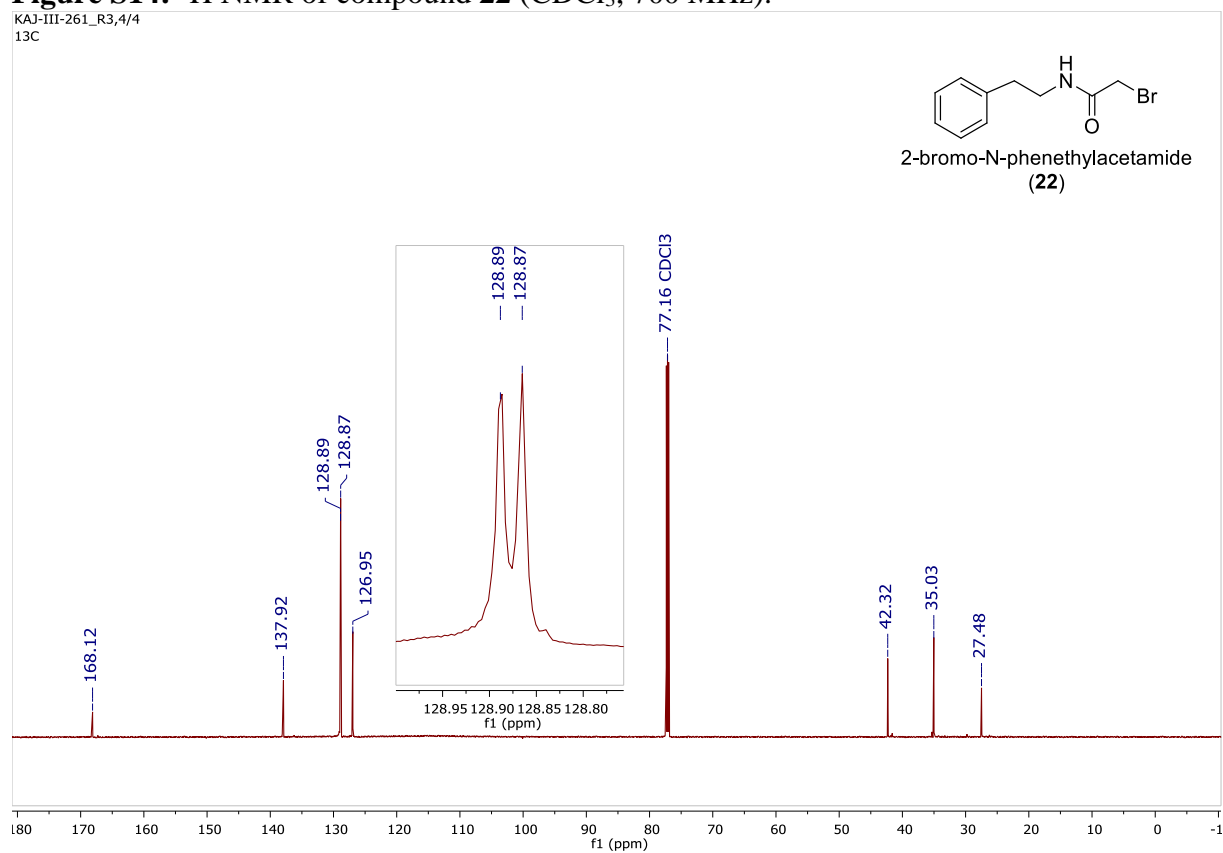

**Figure S15:**  $^{13}\text{C}$  NMR of compound **22** ( $\text{CDCl}_3$ , 176 MHz).

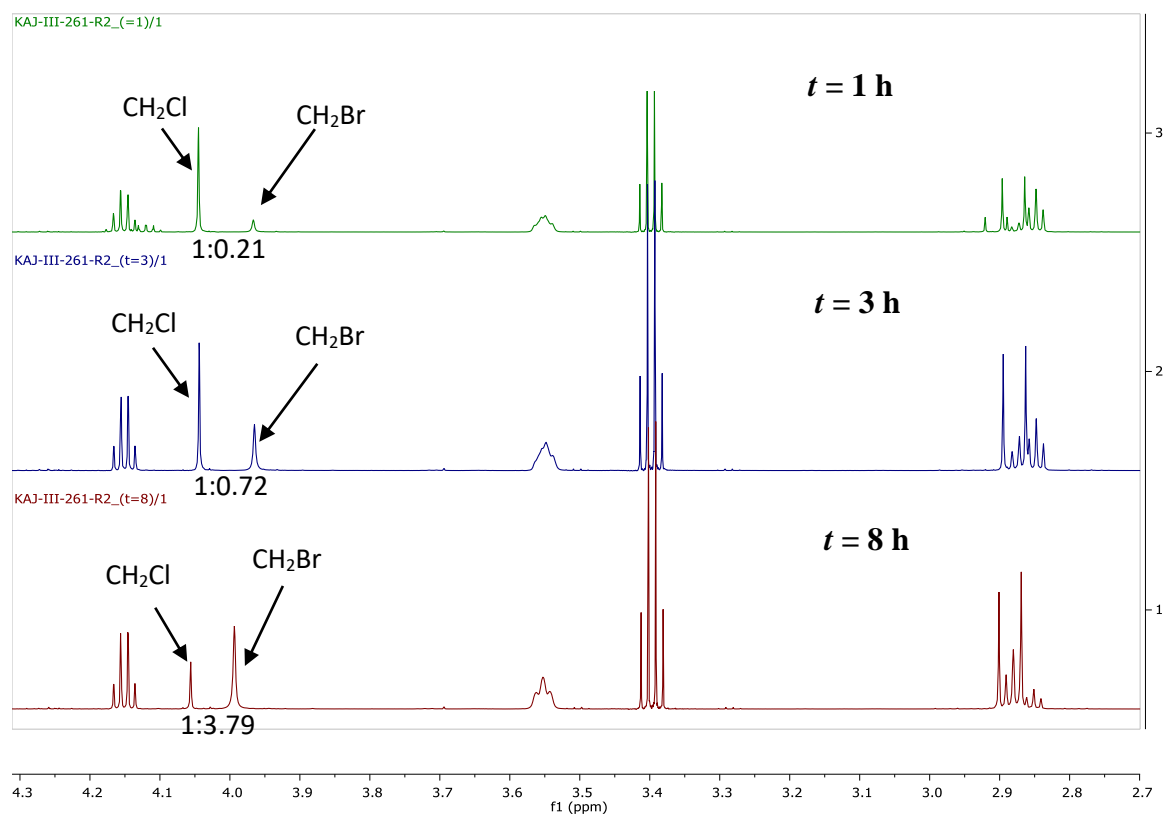

**Figure S16:** Monitoring by  $^1\text{H}$  NMR of the reaction progress between **13** and BTMS ( $\text{CD}_3\text{CN}$ , 700 MHz): zoom in of the ranges 2.7–4.3 ppm.

### 3.6 Compound 21

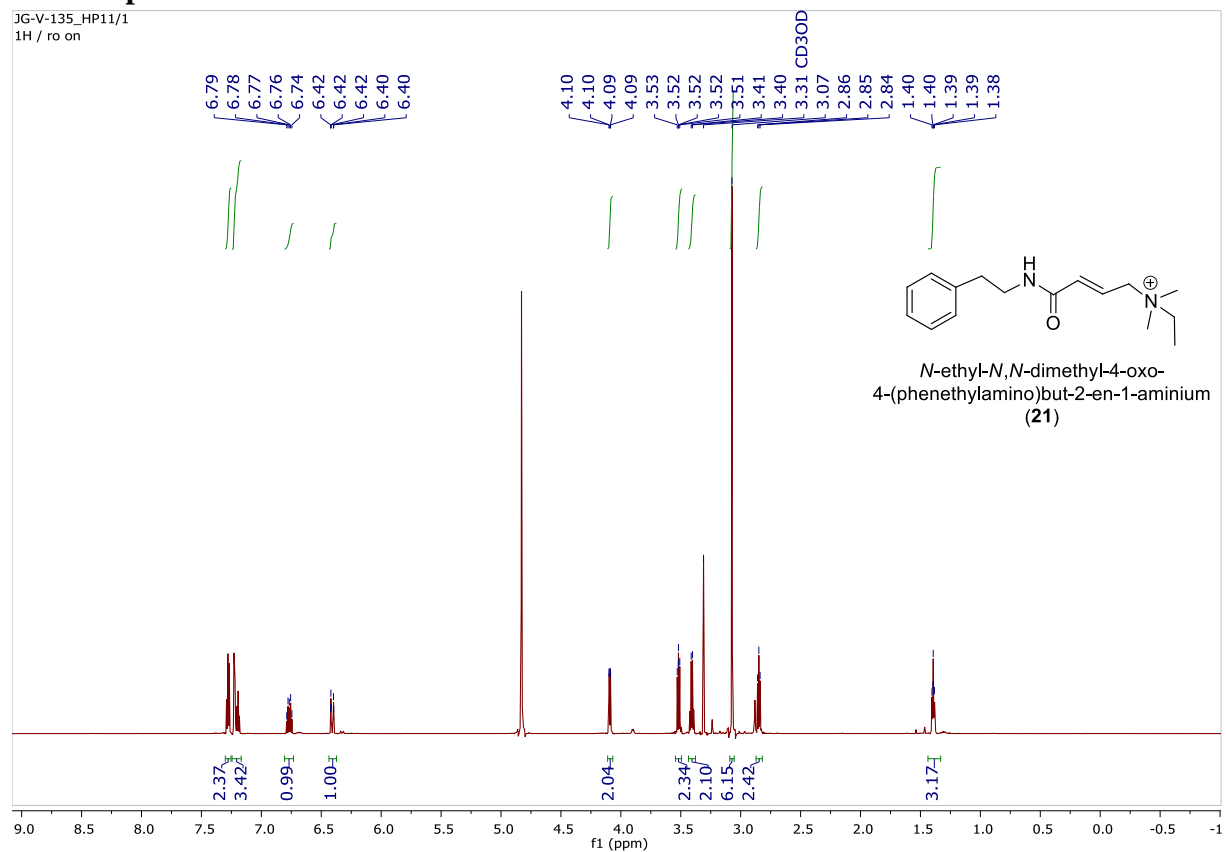

**Figure S17:**  $^1\text{H}$  NMR of compound **21** ( $\text{CD}_3\text{OD}$ , 700 MHz).



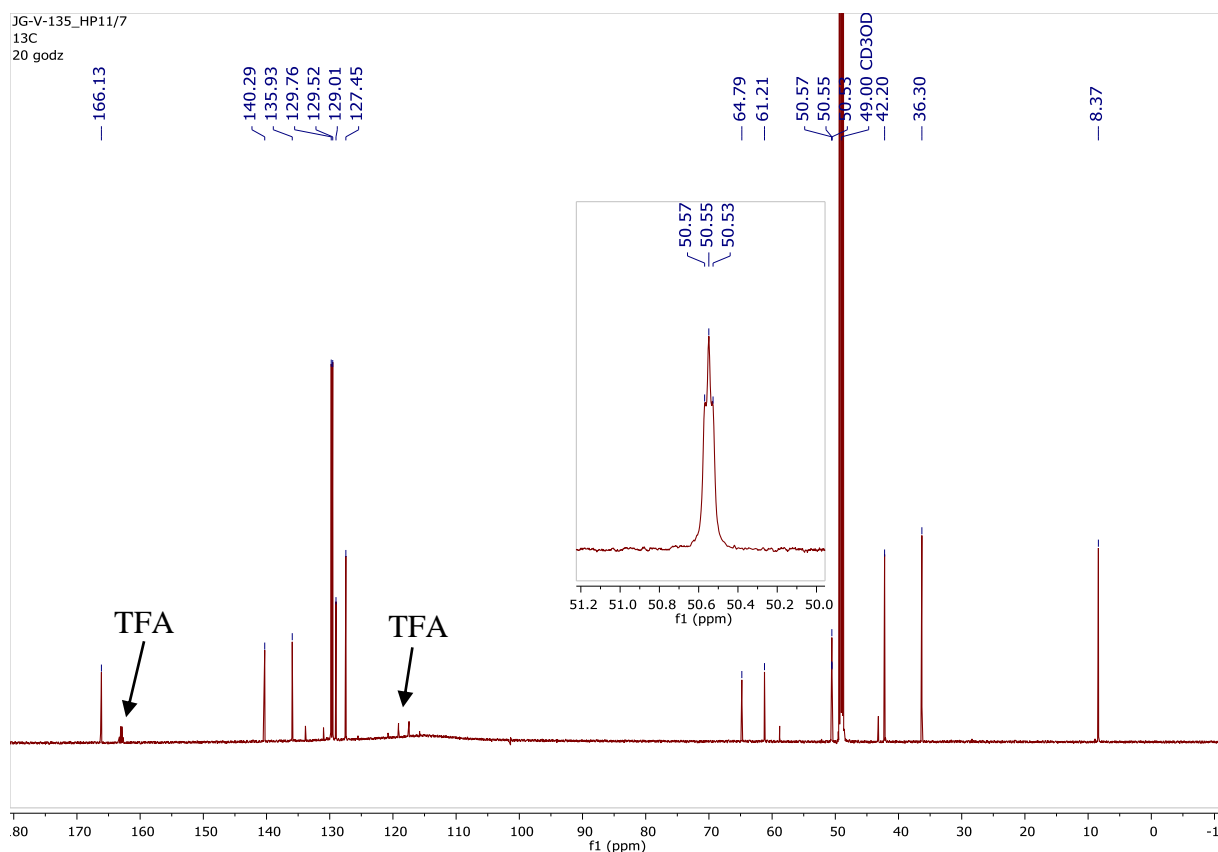

**Figure S18:**  $^{13}\text{C}$  NMR of compound **21** ( $\text{CD}_3\text{OD}$ , 176 MHz).

Note: Compound **21** was purified by HPLC using : A: 95%  $\text{H}_2\text{O}$  + 5% ACN + 0.2% TFA; B: 95% ACN + 5%  $\text{H}_2\text{O}$  + 0.2% TFA, gradient. The peaks of residual TFA were identified in the  $^{13}\text{C}$  NMR spectrum.

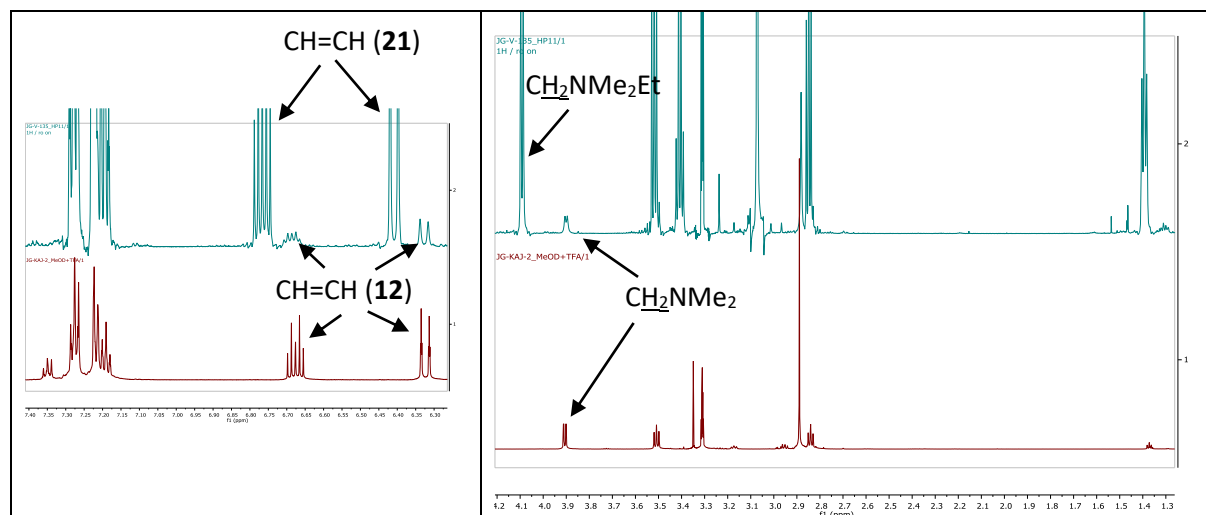

**Figure S19:** Comparison of the  $^1\text{H}$  NMR spectra of substrate **12** (bottom spectrum) and product **21** (top spectrum; compound contaminated with  $\approx 10\%$  of substrate **12**) ( $\text{CD}_3\text{OD}$  + TFA, 700 MHz): zoom in of the ranges 1.25–4.20, and 6.30–7.35 ppm. The representative peaks were identified.

### 3.7 Monitoring the experiments for section 5 by NMR

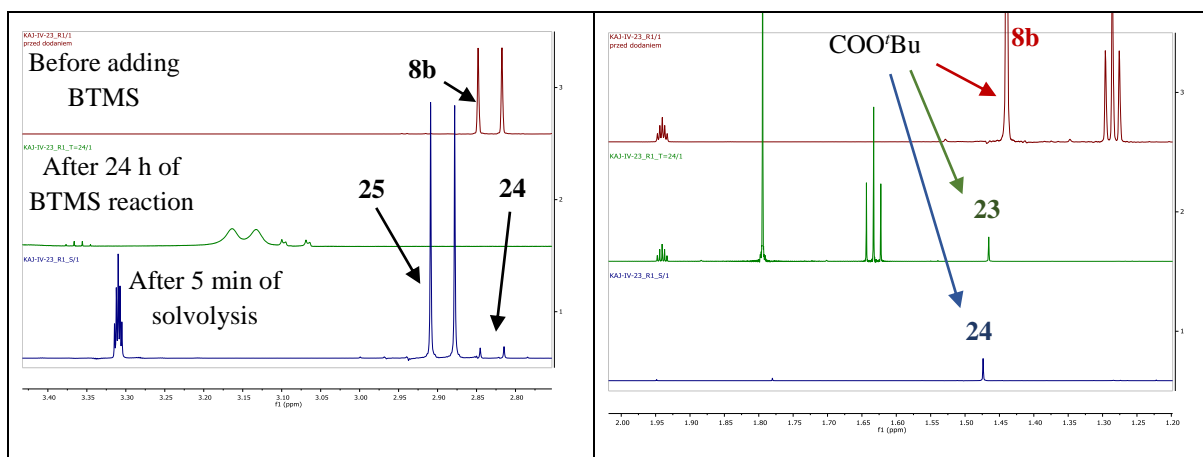

**Figure S20:** Monitoring of the reaction between **8b** and BTMS: top:  $^1\text{H}$  NMR spectrum of **8b** before adding BTMS; middle:  $^1\text{H}$  NMR after 24 h of reaction between **8b** and BTMS ( $\text{CD}_3\text{CN}$ , 700 MHz); bottom:  $^1\text{H}$  NMR after 5 min of solvolysis ( $\text{CD}_3\text{OD}$ , 700 MHz); zoom in of the ranges 3.45–2.7 and 2.0–1.2 ppm; see Table 4, entry 3.

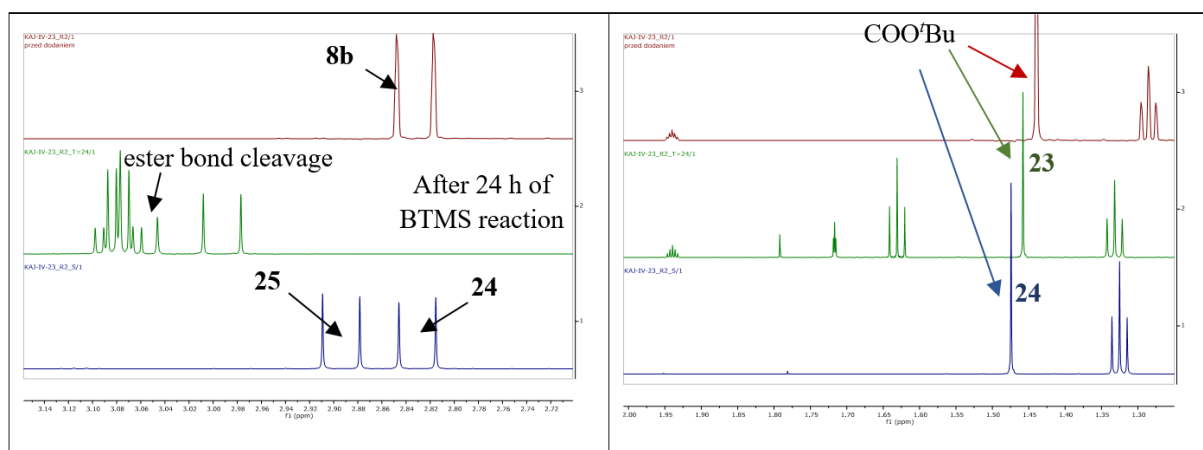

**Figure S21:** Monitoring of the reaction between **8b** and BTMS in the presence of 1 equiv of TEA: top:  $^1\text{H}$  NMR spectrum of **8b** before adding BTMS; middle:  $^1\text{H}$  NMR after 24 h of reaction between **8b** and BTMS ( $\text{CD}_3\text{CN}$ , 700 MHz); bottom:  $^1\text{H}$  NMR after 5 min of solvolysis ( $\text{CD}_3\text{OD}$ , 700 MHz); zoom in of the ranges 3.15–2.7 and 2.0–1.25 ppm; see Table 4, entry 4.

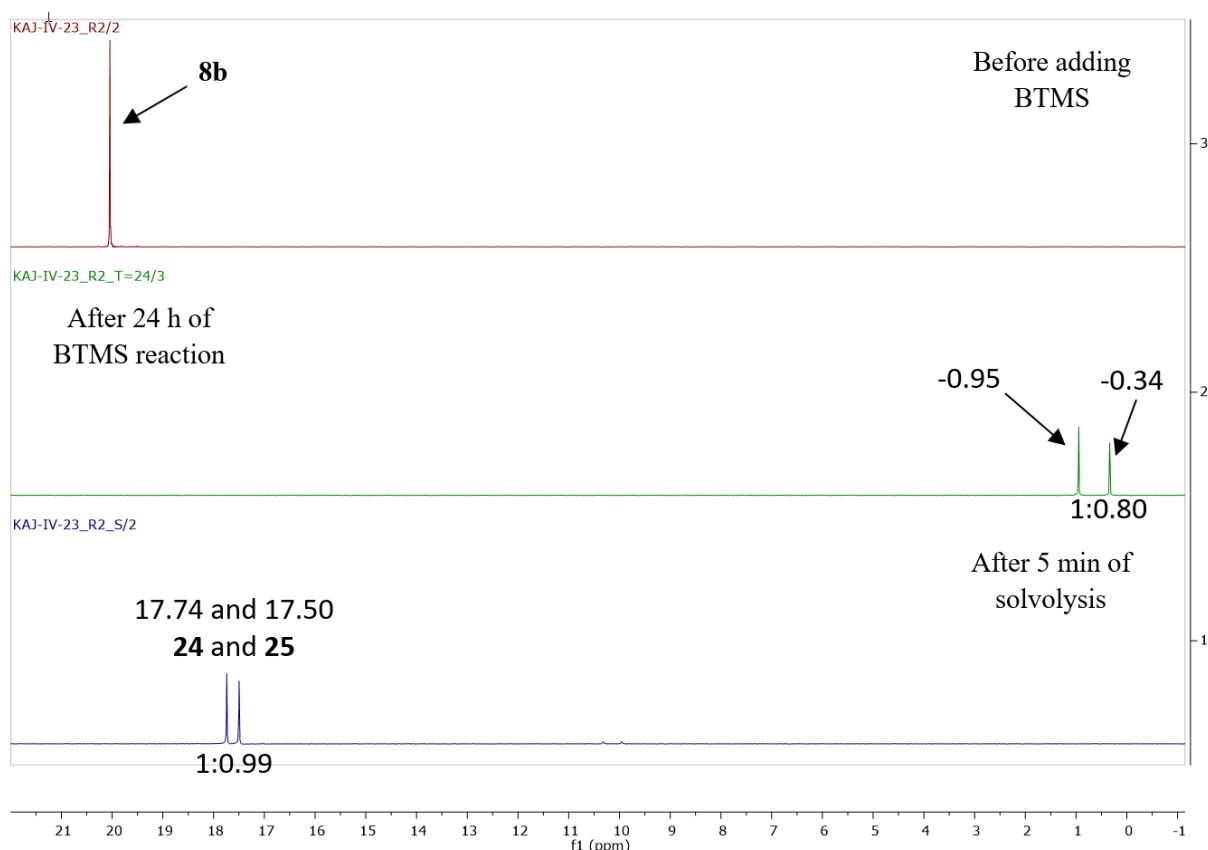

**Figure S21a:** Monitoring the reaction between **8b** and BTMS in the presence of 1 equiv of TEA: top:  $^{31}\text{P}$  NMR spectrum of **8b** before adding BTMS; middle:  $^{31}\text{P}$  NMR after 24 h of reaction between **8b** and BTMS ( $\text{CD}_3\text{CN}$ , 700 MHz); bottom:  $^{31}\text{P}$  NMR after 5 min of solvolysis ( $\text{CD}_3\text{OD}$ , 700 MHz); zoom in of the ranges 3.15–2.7 and 2.0–1.25 ppm; see Table 4, entry 4.

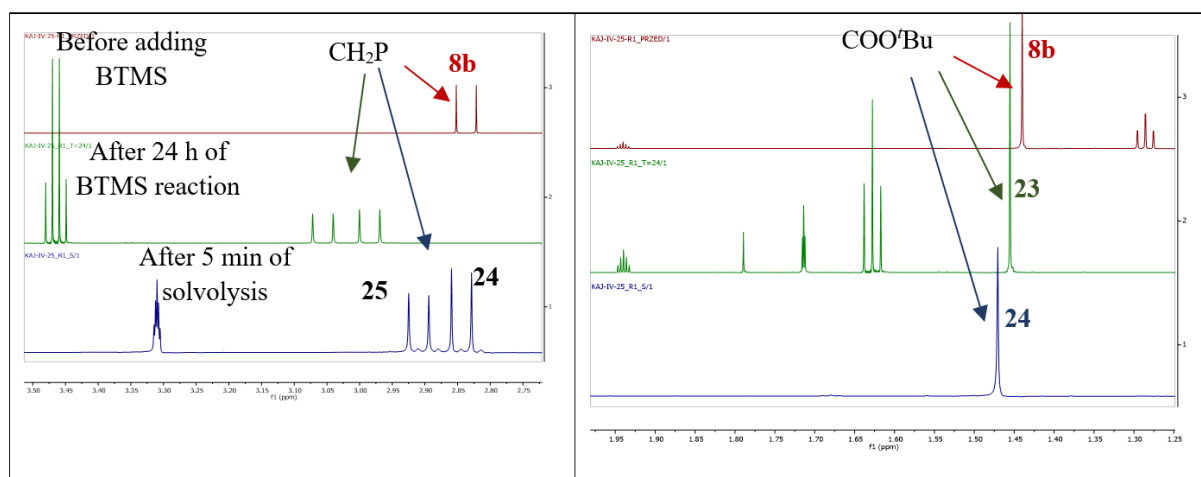

**Figure S22:** Monitoring the reaction between **8b** and BTMS in the presence of 2 equiv of pyridine: top:  $^1\text{H}$  NMR spectrum of **8b** before adding of BTMS; middle:  $^1\text{H}$  NMR after 24 h of reaction between **8b** and BTMS ( $\text{CD}_3\text{CN}$ , 700 MHz); bottom:  $^1\text{H}$  NMR after 5 min of solvolysis ( $\text{CD}_3\text{OD}$ , 700 MHz); zoom in of the ranges 3.5–2.7 and 2.0–1.25 ppm; see Table 4, entry 5.

## 4. References

- 
- <sup>1</sup> Jiang, C.-s.; Wang, X.-m.; Zhang, S.-q.; Meng, L.-s.; Zhu, W.-h.; Xu, J.; Lu, S.-m. *Bioorg. Med. Chem.* **2015**, *23*, 6510-6519.
- <sup>2</sup> Bateman, L. A.; Nguyen, T. B.; Roberts, A. M.; Miyamoto, D. K.; Ku, W. M.; Huffman, T. R.; Petri, Y.; Heslin, M. J.; Contreras, C. M.; Skibola, C. F.; Olzmann, J. A.; Nomura, D. K. *Chem. Commun.* **2017**, *53*, 7234-7237.
- <sup>3</sup> Kaźmierczak, A.; Kusy, D.; Niinivehmas, S. P.; Gmach, J.; Joachimiak, Ł.; Pentikäinen, O. T.; Gendaszewska-Darmach, E.; Błażewska, K. M. *J. Med. Chem.* **2017**, *60*, 8781-8800.
- <sup>4</sup> Marma, M. S.; Xia, Z.; Stewart, C.; Coxon, F.; Dunford, J. E.; Baron, R.; Kashemirov, B. A.; Ebetino, F. H.; Triffitt, J. T.; Russell, R. G. G.; McKenna, C. E. *J. Med. Chem.* **2007**, *50*, 5967-5975.
- <sup>5</sup> Cumine, F.; Zhou, S.; Tuttle, T.; Murphy, J. A. *Org. Biomol. Chem.* **2017**, *15*, 3324-3336.
- <sup>6</sup> Safrygin A., Dar'in D., Lukin A., Bakhholdina A., Sapegin A., Krasavin M. *Tetrahedron Letters* **2019**, *60*, 777-779.
- <sup>7</sup> Bodor, N.; Abdel-Alim, A. A. M. *J. Pharm. Sci.* **1985**, *74*, 241-245.
- <sup>8</sup> Xie, H.; Ng, D.; Savinov, S. N.; Dey, B.; Kwong, P. D.; Wyatt, R.; Smith, A. B.; Hendrickson, W. A. *J. Med. Chem.* **2007**, *50*, 4898-4908.
- <sup>9</sup> APEX-II, Bruker AXS, Madison, Wisconsin, USA.
- <sup>10</sup> SAINT, Bruker AXS, Madison, Wisconsin, USA.
- <sup>11</sup> SADABS, Bruker AXS, Madison, Wisconsin, USA.
- <sup>12</sup> Sheldrick, G. M. (2015). *Acta Cryst.* **A71**, 3-8.
- <sup>13</sup> Sheldrick, G. M. (2015). *Acta Cryst.* **C71**, 3-8.
- <sup>14</sup> SHELXTL, Bruker AXS, Madison, Wisconsin, USA, 2015.
- <sup>15</sup> Bodor N., AbdelAlim A. M. *J. Pharm. Sci.* **1985**, *74*, 241-245.
